# Supplementary material for: Concise synthesis of (+)-fastigiatine
Source: Royal Society of Chemistry journal article supplement (doi:10.1039/c5sc03262h), 2015-10-06

## Concise Synthesis of (+)-Fastigiatine

Renzo A. Samame, Christina M. Owens and Scott D. Rychnovsky\*

*Department of Chemistry, 1102 Natural Sciences II, University of California, Irvine, Irvine, California 92697*

### Supporting Information

|                                                                      |           |
|----------------------------------------------------------------------|-----------|
| I. General experimental and laboratory conditions                    | S2        |
| II. Instrumentation                                                  | S2        |
| III. Experimental Section                                            |           |
| 1. Lithium 4,4'-di- <i>tert</i> -butylbiphenyl (LiDBB) preparation   | S3        |
| 2. <i>tert</i> -Butyl methyl((phenylthio)methyl) carbamate <b>13</b> | S3        |
| 3. Cyclohexanone <b>15</b>                                           | S4        |
| 4. Decalin <b>7</b>                                                  | S5        |
| 5. Bromo enone <b>8</b>                                              | S6        |
| 6. Carbamate <b>10</b>                                               | S8        |
| 7. Tricycle <b>12</b>                                                | S9        |
| 8. (+)-Fastigiatine                                                  | S12       |
| IV. References                                                       | S13       |
| V. Proton and Carbon Spectra                                         | S14 – S31 |

## I. General experimental and laboratory conditions

All glassware was flame- or oven-dried and cooled under argon unless otherwise stated. All reactions and solutions were conducted under argon unless otherwise stated. All commercially available reagents were used as received, unless otherwise stated. Toluene (PhMe), tetrahydrofuran (THF), dimethylformamide (DMF), diethyl ether (Et<sub>2</sub>O) and dichloromethane (CH<sub>2</sub>Cl<sub>2</sub>) were degassed and dried by filtration through activated alumina under vacuum according to the procedure by Grubbs.<sup>1</sup> Diisopropylamine (DIPA), acetonitrile (MeCN), 1,3-Dimethyl-3,4,5,6-tetrahydro-2-pyrimidinone (DMPU) were distilled from CaH<sub>2</sub> prior to use. All reactions involving LiDBB were conducted with glass stirbars. Thin layer chromatography (TLC) was performed with Millipore 60 F<sub>254</sub> glass-backed silica gel plates and visualized using potassium permanganate, Dragendorff-Munier, ceric ammonium molybdate (CAM) or vanillin stains. Flash column chromatography was performed according to the method by Still, Kahn, and Mitra<sup>2</sup> using Millipore Geduran Silica 60 (40-63  $\mu$ m).

## II. Instrumentation

All data collected at ambient temperature unless noted. <sup>1</sup>H NMR spectra were taken at 500 or 600 MHz, calibrated using residual NMR solvent or TMS and interpreted on the  $\delta$  scale. Peak abbreviations are listed: s = singlet, d = doublet, t = triplet, q = quartet, pent = pentet, dd = doublet of doublets, ddd = doublet of doublets of doublets, dt = doublet of triplets, ddt = doublet of doublet of triplets, dq = doublet of quartets, m = multiplet, app = apparent, br = broad. <sup>13</sup>C NMR spectra were taken at 125 MHz, calibrated using the NMR solvent, and interpreted on the  $\delta$  scale. Some samples were analyzed above room temperature to minimize line broadening due to rotamers.

### III. Experimental Section

#### General procedure for preparation of LiDBB stock solution.

A round-bottom flask equipped with a glass stir bar was charged with 4,4'-di-*tert*-butylbiphenyl (1 equiv) and the flask was flame-dried under vacuum until 4,4'-di-*tert*-butylbiphenyl melted, at which point it was cooled to room temperature under argon. Lithium wire (10 equiv) was clipped in a stream of argon. Dry THF (0.5 M) was added and the solution stirred to give a dark green solution within 2-3 min. The mixture was cooled to 0 °C and stirred for 5 h to produce lithium di-*tert*-butylbiphenyl (LiDBB) at full molarity.

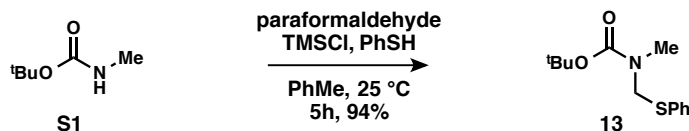

#### Thioether 13:

Dry toluene (149 mL) was added to a 500 mL round-bottom flask containing *tert*-butyl methyl carbamate **S1** (5.86 g, 0.044 mol, 1 equiv), paraformaldehyde (1.55 g, 0.051 mol, 1.15 equiv) and magnesium sulfate (15 g) at room temperature. After 5 min, TMSCl (16.9 mL, 0.134 mol, 3 equiv) was added dropwise via syringe. The solution was allowed to stir for 15 min and then thiophenol (5.07 mL, 0.025 mol, 1.1 equiv) was added, and the resulting mixture was allowed to stir until starting material was consumed as observed by TLC. After 5 h, the crude reaction mixture was filtered, concentrated and purified via chromatography (15% EtOAc in hexanes) to afford product **13** (10.62 g, 94%) as a crystalline white solid.  $^1\text{H NMR}$  (500 MHz,  $\text{CDCl}_3$ , 65 °C)  $\delta$  7.49 (d,  $J$  = 7.0 Hz, 1H), 7.31–7.20 (m, 3H), 4.75 (s, 2H), 2.90 (s, 3H), 1.33 (s, 9H);  $^{13}\text{C NMR}$  (125 MHz,  $\text{CDCl}_3$ , 65 °C)  $\delta$  155.0, 134.5, 133.4, 129.0, 127.6, 80.2, 55.5, 33.3, 28.3; **IR** (thin film) 2972, 2929, 1699, 1478, 1443, 1389, 1265, 1230, 1172, 1133, 1052, 869, 745  $\text{cm}^{-1}$ ; **HRMS** (ESI/methanol)  $m/z$  calcd for  $\text{C}_{13}\text{H}_{19}\text{NO}_2\text{SNa}$  ( $M + \text{Na}$ ) $^+$ : 276.1034, found: 276.1029. **mp** = 60–63 °C; **TLC** (20% EtOAc in hexanes)  $R_f$  = 0.42 ( $\text{KMnO}_4$  stain).

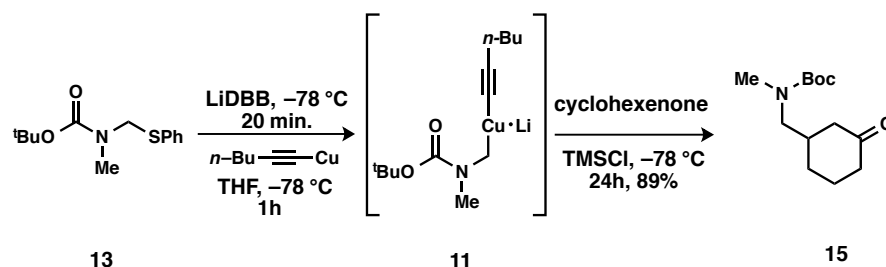

### Cyclohexanone **15**:

A round bottom flask containing **13** (211 mg, 0.83 mmol) and 1,10-phenanthroline (2-3 crystals) was dried by azeotroping three times with freshly distilled benzene. The flask was then equipped with a glass stir bar and THF (15 mL) was introduced under Ar. The mixture was cooled to  $-78^\circ\text{C}$  and *n*-BuLi/hexanes (2-3 M) was added until a brown dark color persisted ( $\sim 0.3\text{--}0.4$  mL). This procedure was performed to quench adventitious proton sources. LiDBB (4.7 mL, 1.86 mmol, 2.2 equiv) was then added dropwise over 10 min at  $-78^\circ\text{C}$  until a dark-green color persisted, and the mixture was allowed to stir for 20 min. A separate flask containing 1-hexynyl copper (240 mg, 1.67 mmol) and tetrahydrofuran (3 mL) was cooled to  $-78^\circ\text{C}$  and trimethyl phosphite (0.44 mL, 3.75 mmol) was introduced; the mixture was stirred until a clear solution developed. The resulting homogeneous solution was added via syringe to the organolithium reagent down the flask wall over 3 min and stirring was continued for 1 h to produce **15** as deep red solution. The cyclohexenone (40 mg, 0.42 mmol) was added as a solution in THF (0.3 mL) with freshly distilled TMSCl (263  $\mu\text{L}$ , 2.08 mmol). The resulting mixture was stirred at  $-78^\circ\text{C}$  for 24 h and quenched with 10% concentrated ammonium hydroxide/saturated ammonium chloride (20 mL), followed by warming to room temperature. After 1 h, the organic layers were separated and the aqueous layers were extracted with ethyl acetate (20 mL) three times. The organic layers were combined, dried and concentrated under vacuum. The resulting mixture was filtered through a plug silica with 20%  $\text{CH}_2\text{Cl}_2$  in hexanes to remove excess of 4,4'-di-*tert*-butylbiphenyl, at which point ethyl acetate was used to flushed the plug. The material was concentrated under vacuum. The mixture was concentrated, loaded onto silica

gel with DCM and purified by column chromatography, eluting with 25% EtOAc/hexanes gradient, to afford **16** (89.2 mg, 89%).

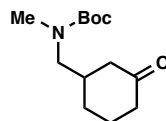**15**

**<sup>1</sup>H NMR** (500 MHz, CDCl<sub>3</sub>) δ 3.24–3.03 (m, 2H), 2.84–2.74 (m, 3H), 2.39–2.28 (m, 2H), 2.27–2.18 (m, 1H), 2.11–1.90 (m, 3H), 2.67 (s, 3H), 1.88–1.75 (m, 1H), 1.67–1.53 (m, 1H), 1.40 (s, 9H), 1.38–1.27 (m, 1H); **<sup>13</sup>C NMR** (125 MHz, CDCl<sub>3</sub>) δ 211.3, 210.9, 156.2, 155.8, 79.8, 79.6, 54.5, 53.9, 45.8, 45.7, 41.5, 38.5, 38.1, 35.2, 29.1, 28.5, 25.3, 25.2; **HRMS** (ESI/methanol) *m/z* calcd for C<sub>13</sub>H<sub>23</sub>NO<sub>3</sub>Na (M + Na)<sup>+</sup>: 264.1576, found: 264.1572; **TLC** (25 % EtOAc in Hexanes) R<sub>f</sub> = 0.33 (CAM stain). Spectral data matched those reported in the literature.<sup>3</sup>

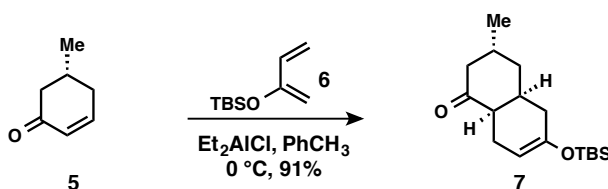

### Decalin 7:

A round-bottom flask was charged with (+)-5-methylcyclohex-2-en-1-one (2.01 g, 18.26 mmol) and 2-*tert*-butyldimethylsiloxy-1,3-butadiene (4.68 g, 25.44 mmol) and purged 4 times via vacuum/argon cycles. Dry toluene (75 mL) was added and the solution was cooled to 0 °C. Diethyl aluminum chloride (19.1 mL, 1.0 M in toluene 19.1 mmol) was then added dropwise over a 10 min period. The resulting mixture was allowed to reach room temperature with stirring. After 1.5 h, the mixture was cooled to 0 °C and the reaction was quenched by addition of saturated NaHCO<sub>3</sub> (250 mL) and 10% potassium sodium tartrate (20 mL). The

aqueous layer was separated and extracted with Et<sub>2</sub>O (3 x 200 mL). The combined organic layers were washed with saturated NaHCO<sub>3</sub> (3 x 200 mL), brine (3 x 200 mL), dried over Na<sub>2</sub>SO<sub>4</sub> and concentrated under reduced pressure. Volatile materials were removed under high vacuum (ca. 1 Torr) overnight to afford the desired product **7** (4.91 g, 91%) as light yellow oil. Spectral data were consistent with those reported in the literature.<sup>4</sup> **<sup>1</sup>H NMR** (500 MHz, CDCl<sub>3</sub>) δ 4.81–4.78 (app. m, 1H), 2.61 (t, *J* = 5.8 Hz, 1H), 2.57–2.48 (m, 2H), 2.39 (ddd, *J* = 13.5, 4.8, 2.0 Hz, 1H), 2.25–2.17 (m, 1H), 2.20–1.95 (m, 2H), 1.86 (app. dd, *J* = 8.0, 1.5 Hz, 2H), 1.80 (d, *J* = 14.5 Hz, 1H), 1.64 (ddd, *J* = 13.5, 11.5, 4.0 Hz, 1H), 1.03 (d, *J* = 6 Hz, 3H), 0.89 (s, 9H), 0.11, 0.08; **<sup>13</sup>C NMR** (125 MHz, CDCl<sub>3</sub>) δ 211.1, 148.2, 102.0, 49.7, 47.0, 38.2, 36.1, 31.9, 30.8, 25.9, 22.6, 22.2, 18.1, -4.1, -4.4; **HRMS** (ESI/methanol) *m/z* calcd for C<sub>17</sub>H<sub>31</sub>O<sub>2</sub>Si (*M* + *H*)<sup>+</sup>: 295.2093, found: 295.2095. **TLC** (10% EtOAc in hexanes) *R<sub>f</sub>* = 0.60 (CAM Stain).

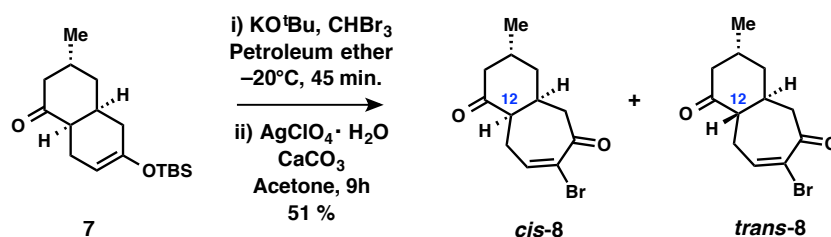

### Bromo enone 8:

To a solution of decalin **7** (1.21 g, 4.12 mmol) in petroleum ether (110 mL) at -20 °C was added potassium *tert*-butoxide (1.39 g, 12.37 mmol) in 3 portions. The heterogeneous mixture turned yellow within 2 min. After 2 min, freshly distilled bromoform (1.08 mL, 12.37 mmol) was added dropwise in petroleum ether (20 mL) over 4 min. The reaction mixture was allowed to stir at -20 °C until starting material was consumed as observed by TLC. After 45 min, the mixture was removed from the cooling bath and filtered through a silica plug with 25% EtOAc in petroleum ether. The filtrate was concentrated under vacuum and the resulting yellow oil was dissolved in acetone (45 mL). Calcium carbonate (2.06 g, 20.63 mmol) and silver perchlorate monohydrate (1.85 g, 8.25 mmol) were added. The reaction was allowed to stir at 25 °C for 9 h, during which time a dark

precipitate developed. The reaction was quenched by addition of Et<sub>3</sub>N (1.15 mL, 8.25 mmol) and silica gel (1.5 g), and the mixture concentrated under vacuo. The resulting crude mixture was flushed through a plug of silica using Et<sub>2</sub>O. The material was concentrated under vacuo and purified via chromatography (eluent, gradient 15% → 25% EtOAc in hexanes) to afford a mixture of diastereomers of **8** (0.57 g, 51%) as yellow oil (~3:1 *cis/trans* mixture of C-12 epimers). A small sample of the mixture was purified by MPLC to separate the *cis* and *trans* isomers for characterization.

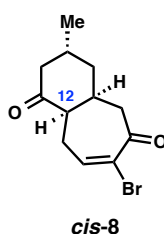

**<sup>1</sup>H NMR** (500 MHz, CDCl<sub>3</sub>) δ 7.24 (dd, *J* = 10.5, 4.8 Hz, 1H), 2.75–2.65 (m, 3H), 2.57–2.46 (m, 3H), 2.4 (dd, *J* = 16.3, 10.3 Hz, 1H), 2.07 (t, *J* = 12.8 Hz, 1H), 1.97–1.87 (m, 1H), 1.84 (dt, *J* = 13.5, 3.3 Hz, 1H), 1.75 (ddd, *J* = 14.8, 11.5, 4.3 Hz, 1H), 1.05 (d, *J* = 6.5 Hz, 1H); **<sup>13</sup>C NMR** (125 MHz, CDCl<sub>3</sub>) δ 209.8, 195.7, 144.1, 125.6, 49.7, 47.4, 45.3, 39.4, 34.7, 29.9, 27.0, 22.1; **IR** (thin film) 3444, 2955, 2924, 1705, 1685, 1600, 1452, 1379, 1231, 1111, 1041, 916 cm<sup>-1</sup>; **HRMS** (ESI/methanol) *m/z* calcd for C<sub>12</sub>H<sub>15</sub>BrO<sub>2</sub>Na (M + Na)<sup>+</sup>: 293.0153, found: 293.0161. **TLC** (20% EtOAc in hexanes) R<sub>f</sub> = 0.33 (CAM Stain).

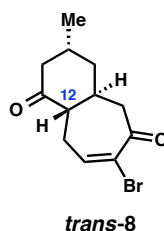

**<sup>1</sup>H NMR** (500 MHz, CDCl<sub>3</sub>) δ 7.22 (dd, *J* = 8.3, 4.3 Hz, 1H), 2.92 (dd, *J* = 14.0, 6.0 Hz, 1H), 2.87–2.78 (m, 1 Hz), 2.60 (dd, *J* = 14.0, 5.5 Hz, 1H), 2.53–2.36 (m, 3H), 2.27–2.21 (m, 1H), 2.18 (d, *J* = 13 Hz, 1H), 1.94 (td, *J* = 13.0, 4.8 Hz, 1H),

1.68 (d,  $J = 14.5$  Hz, 1H), 0.98 (d,  $J = 7$  Hz, 1H);  $^{13}\text{C}$  NMR (125 MHz,  $\text{CDCl}_3$ )  $\delta$  209.4, 195.3, 145.3, 125.9, 54.9, 48.0, 46.9, 38.3, 35.6, 29.8, 28.4, 20.0; IR (thin film) 3437, 2957, 2826, 1602, 1711, 1687, 1459, 1385, 1238, 1090, 912  $\text{cm}^{-1}$ ; HRMS (ESI/methanol)  $m/z$  calcd for  $\text{C}_{12}\text{H}_{15}\text{BrO}_2\text{Na}$  ( $M + \text{Na}$ ) $^+$ : 293.0153, found: 293.0161. TLC (20% EtOAc in hexanes)  $R_f = 0.32$  (CAM Stain).

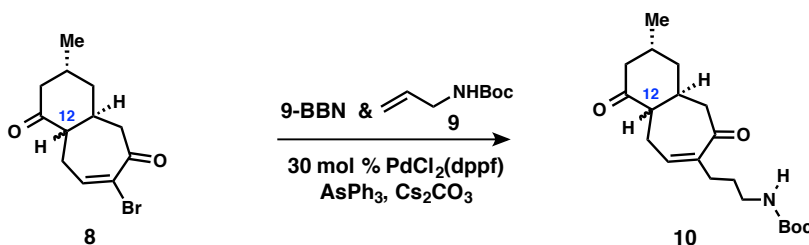

### Carbamate 10:

To a solution of *tert*-butyl allylcarbamate **9** (402 mg, 2.56 mmol) in degassed THF (4.3 mL) was added a solution of 9-BBN (0.5 M in THF, 7.2 mL, 3.58 mmol) at room temperature. After stirring for 4 h, the solution was treated with degassed water (615  $\mu\text{L}$ , 34.14 mmol) for 20 min. In a separate Schlenk flask, bromo enone **8** (461 mg, 1.71 mmol),  $\text{CsCO}_3$  (1.22 g, 3.76 mmol),  $\text{AsPh}_3$  (157 mg, 0.51 mmol), and  $\text{Pd}(\text{dppf})\text{Cl}_2$  (375 mg, 0.51 mmol) were degassed via high-vacuum/argon cycles (4x) and diluted in degassed DMF (11 mL). The resulting mixture was then stirred for 15 min before the borane solution was added. The reaction was stirred for 4 h at 80  $^\circ\text{C}$ , at which point the mixture turned black. The mixture was cooled to room temperature, diluted with  $\text{Et}_2\text{O}$  (15 mL) and filtered through a plug of alumina. Concentration in *vacuo* followed by purification via flash column chromatography (eluent, gradient 30%  $\rightarrow$  40% EtOAc in hexanes) afforded inseparable diastereomers (494 mg, 83%) of **7** as a colorless oil ( $\sim$  3:2 *trans/cis* epimers at C-12).  $^1\text{H}$  NMR (600 MHz,  $\text{CDCl}_3$ )  $\delta$  6.50–6.40 (m, 1H), 4.67–4.55 (br. s, 1H), 3.13–3.01 (app. m, 2H), 2.83–2.73 (app. m, 1H), 2.66–2.60 (m, 0.5H), 2.59–2.54 (m, 1H), 2.49–2.40 (m, 2.5H), 2.34–2.25 (m, 2.5H), 2.20–2.11 (m, 2H), 2.03 (t,  $J = 12.5$  Hz, 0.5H), 1.97–1.87 (m, 1H), 1.82–1.75 (m, 0.5H), 1.73–1.69 (m, 0.5H), 1.68–1.64 (m, 1H), 1.54 (p,  $J = 5.9$  Hz, 2H), 1.42 (s, 9H), 1.02 (d,  $J = 6.5$  Hz, 1.5H), 0.97 (d,  $J = 7.0$  Hz, 1.5H);  $^{13}\text{C}$  NMR (125 MHz,  $\text{CDCl}_3$ )  $\delta$  211.1,



210.5, 204.6, 204.1, 156.2, 142.6, 139.5, 138.4, 79.3, 55.6, 53.3, 49.8, 49.1, 48.0, 47.04, 46.99, 40.5, 40.1, 39.5, 39.0, 38.3, 36.0, 34.8, 30.5, 29.99, 29.97, 29.92, 29.6, 28.6, 26.7, 25.6, 22.1, 20.1; **IR** (thin film) 3373, 2953, 2921, 2881, 1708, 1664, 1517, 1454, 1391, 1363, 1252, 1173, 875  $\text{cm}^{-1}$ ; **HRMS** (ESI/methanol)  $m/z$  calcd for  $\text{C}_{20}\text{H}_{31}\text{NO}_4\text{Na}$  ( $\text{M} + \text{Na}$ ) $^+$ : 372.2151, found: 372.2157. **TLC** (40% EtOAc in hexanes)  $R_f$  = 0.32 (CAM Stain).

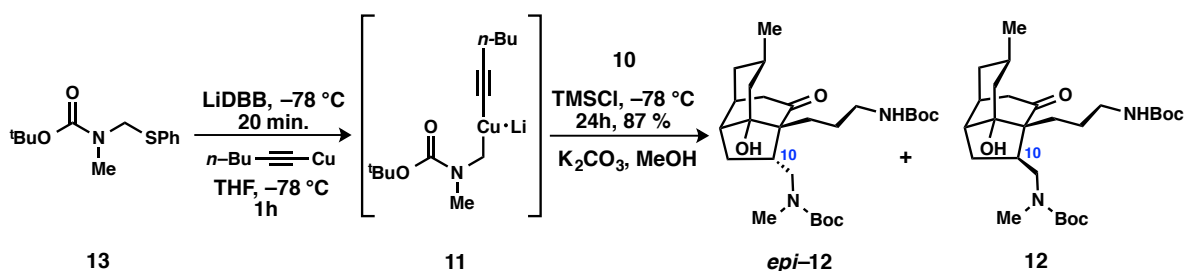

### Tricyclic **12** and its C10 epimer:

A round bottom flask containing **13** (0.62 g, 2.44 mmol) and 1,10-phenanthroline (2-3 crystals) was dried by azeotroping three times with freshly distilled benzene. The flask was then equipped with a glass stir bar and THF (27 mL) was introduced under Ar. The mixture was cooled to  $-78\text{ }^{\circ}\text{C}$  and  $n\text{-BuLi}$ /hexanes (2-3 M) was added until a brown dark color persisted ( $\sim 0.3\text{--}0.4$  mL). This procedure was performed to quench adventitious proton sources. LiDBB (12.8 mL, 5.12 mmol, 2.1 equiv) was then added dropwise over 10 min at  $-78\text{ }^{\circ}\text{C}$  until a dark-green color persisted, and the mixture was allowed to stir for 20 min. A separate flask containing 1-hexynyl copper (0.71 g, 4.94 mmol) and tetrahydrofuran (6.2 mL) was cooled to  $-78\text{ }^{\circ}\text{C}$  and trimethyl phosphite (1.8 mL, 14.6 mmol) was introduced; the mixture was stirred until a clear solution developed. The resulting homogeneous solution was added via syringe to the organolithium reagent down the flask wall over 3 min and stirring was continued for 1 h to produce **15** as deep red solution. The carbamate **10** (213 mg, 0.61 mmol) was added as a solution in THF (0.5 mL) with freshly distilled TMSCl (0.39 mL, 3.05 mmol). The resulting mixture was stirred at  $-78\text{ }^{\circ}\text{C}$  for 24 h and quenched with 10% concentrated ammonium hydroxide/saturated ammonium

chloride (120 mL), followed by warming to room temperature. After 1 h, the organic layers were separated and the aqueous layers were extracted with ethyl acetate (40 mL) three times. The organic layers were combined, dried and concentrated under vacuum. The resulting mixture was filtered through a plug silica with 20% CH<sub>2</sub>Cl<sub>2</sub> in hexanes to remove excess of 4,4'-di-*tert*-butylbiphenyl, at which point ethyl acetate was used to flush the plug. The material was concentrated under vacuum. The crude product was dissolved in methanol (15 mL) with potassium carbonate (627 mg, 4.54 mmol) and stirred for 4 h. The mixture was concentrated, loaded onto silica gel with DCM and purified by MPLC, eluting with 20% to 40% EtOAc/hexanes gradient, to deliver tricycle **12** (126.1 mg, 42%) and its C10 epimer (134.5 mg, 45%).

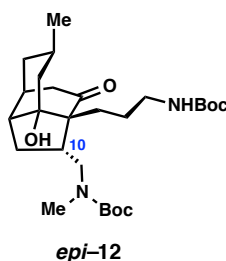

**<sup>1</sup>H NMR** (500 MHz, tol-d<sub>8</sub>, 85 °C)  $\delta$  4.46–4.37 (br s, 1H), 3.42–3.27 (br s, 1H), 3.10 (m, 2H), 2.77–2.72 (m, 1H), 2.71–2.68 (m, 1H), 2.67 (s, 3H), 2.63–2.52 (m, 1H), 2.25 (ddd,  $J$  = 13.5, 11.2, 7.6 Hz, 1H), 2.01 (d,  $J$  = 17.5 Hz, 1H), 1.87 (app d,  $J$  = 13.6 Hz, 1H), 1.85–1.80 (m, 1H), 1.76–1.67 (m, 1H), 1.66–1.56 (m, 5H), 1.45 (s, 18H), 1.37–1.29 (m, 2H), 1.12–1.00 (br s, 1H), 0.86 (q,  $J$  = 13.7 Hz, 2H), 0.70 (d,  $J$  = 6.5 Hz, 3 H); **<sup>13</sup>C NMR** (125 MHz, CDCl<sub>3</sub>, 25 °C)  $\delta$  213.5, 213.3, 156.5, 156.3, 155.8, 80.1, 79.6, 79.3, 65.4, 48.4, 48.0, 47.1, 43.7, 43.2, 43.0, 42.7, 41.8, 41.1, 35.5, 35.3, 34.5, 34.2, 32.1, 29.9, 29.8, 29.6, 28.7, 28.6, 26.0, 25.5, 24.5, 22.9, 22.5, 14.3 ; **IR** (thin film) 3364, 2962, 2925, 1686, 1519, 1482, 1451, 1393, 1367, 1247, 1163, 1043, 870, 771 cm<sup>-1</sup>; **HRMS** (ESI/methanol)  $m/z$  calcd for C<sub>27</sub>H<sub>46</sub>N<sub>2</sub>O<sub>6</sub>Na (M + Na)<sup>+</sup>: 517.3254, found: 517.3261; **TLC** (44 % EtOAc in Hexanes) R<sub>f</sub> = 0.34 (CAM stain);  $[\alpha]_D^{24}$  = -74 (c 1.23, CHCl<sub>3</sub>).

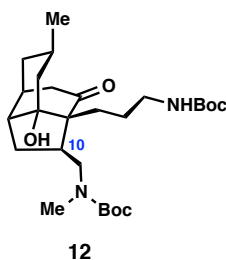

**<sup>1</sup>H NMR** (500 MHz, tol-d<sub>8</sub>, 85 °C)  $\delta$  4.51–4.43 (br s, 1H), 3.75 (dd,  $J$  = 13.3, 11.3 Hz, 1H), 3.17 (dd,  $J$  = 13.8, 4.3 Hz, 1H), 3.12–3.05 (m, 2H), 2.71 (s, 3H), 2.29 (dd,  $J$  = 16.5, 8.0 Hz, 1H), 2.17 (ddd,  $J$  = 12.8, 7.0, 5.3 Hz, 1H), 2.03–1.96 (m, 1H), 1.91–1.85 (m, 1H), 1.79 (d,  $J$  = 16.5 Hz, 1H) 1.74 (dd,  $J$  = 14.0, 4.5 Hz, 1H), 1.69–1.64 (m, 1H), 1.61–1.51 (m, 4H), 1.46 (s, 9H), 1.43 (s, 9H), 1.34–1.26 (m, 3H), 1.06–1.00 (br s, 1H), 0.83 (td,  $J$  = 12.8, 3.0 Hz, 1H), 0.73 (t,  $J$  = 13.0 Hz, 1H), 0.65 (d,  $J$  = 6.0 Hz, 3H), 0.51–0.43 (br s, 1H); **<sup>13</sup>C NMR** (125 MHz, CDCl<sub>3</sub>, 25 °C)  $\delta$  214.4, 214.2, 156.8, 156.4, 156.22, 83.9, 83.8, 79.75, 79.66, 79.12, 79.06, 65.2, 65.1, 52.6, 51.7, 48.0, 43.0, 42.1, 41.9, 41.3, 40.7, 35.4, 35.3, 34.9, 32.1, 31.9, 31.6, 29.9, 29.8, 29.5, 28.6, 25.6, 22.9, 22.7, 21.8, 14.3; **IR** (thin film) 3380, 2957, 2920, 1961, 1514, 1456, 1393, 1362, 1252, 1168, 1033, 876, 771 cm<sup>-1</sup>; **HRMS** (ESI/methanol)  $m/z$  calcd for C<sub>27</sub>H<sub>46</sub>N<sub>2</sub>O<sub>6</sub>Na (M + Na)<sup>+</sup>: 517.3254, found: 517.3234; **TLC** (44 % EtOAc in Hexanes) R<sub>f</sub> = 0.38 (CAM stain);  $[\alpha]^{24}_{\text{D}}$  = -41 (c 1.82, CHCl<sub>3</sub>).

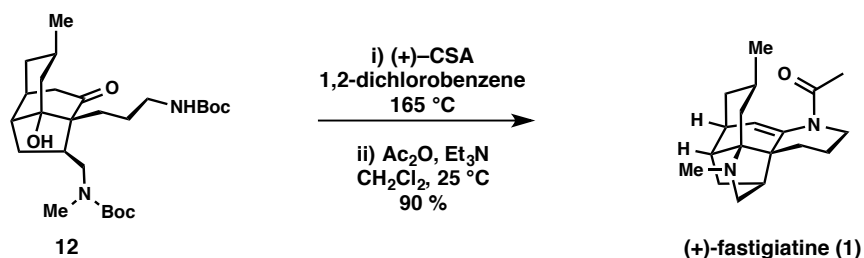

### (+)-Fastigiatine:

A 10 mL Schlenk flask was charged with tricyclic **12** (57.1 mg, 0.12 mmol) and purged three times with argon/vacuum. Freshly distilled and degassed 1,2-dichlorobenzene (5.9 mL) was introduced and the solution cooled to 0 °C, at which point (+)-10-camphorsulfonic acid (402.5 mg, 1.73 mmol) was added. The reaction was removed from the ice bath and warmed to 165 °C in a sealed atmosphere for 1 h. The mixture was cooled to 0 °C, quenched with saturated NaHCO<sub>3</sub> (5 mL) and extracted with CHCl<sub>3</sub> (5 mL) two times. The combined organic layers were dried over Na<sub>2</sub>SO<sub>4</sub> and concentrated to remove CHCl<sub>3</sub>. To the resulting solution were added Et<sub>3</sub>N (0.16 mL, 1.16 mmol) and Ac<sub>2</sub>O (0.11 mL, 1.16 mmol), and the mixture was stirred for 5 h. The reaction was quenched by addition of methanol (2 mL). Concentration under vacuum and purification by silica gel chromatography (gradient 1% → 10% MeOH in CHCl<sub>3</sub> with 0.5% Ammonium hydroxide) afforded (+)-fastigiatine (34.6 mg, 90% yield) as a white crystalline solid. The data for the synthetic natural product matched that reported by Shair.<sup>5</sup>

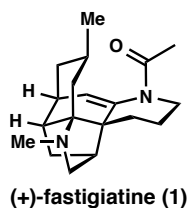

**<sup>1</sup>H NMR** (500 MHz, CDCl<sub>3</sub>, 25 °C) δ 5.19 (d, *J* = 5.5 Hz, 1H), 3.82 (dt, *J* = 11.5, 6.0 Hz, 1H), 3.30–3.21 (m, 2H), 2.42–2.37 (m, 1H), 2.32 (s, 3H), 2.19 (d, 9.0 Hz, 1H), 2.18–2.16 (m, 1H), 2.15 (s, 3H), 2.07 (br. app. d, *J* = 14.5 Hz, 1H), 2.06–1.96 (m, 1H), 1.93–1.89 (m, 1H), 1.81–1.72 (m, 1H), 1.68 (dd, *J* = 14.0, 4.5 Hz, 1H), 1.63–1.53 (m, 3H), 1.43–1.32 (m, 2H), 1.20 (app. t, *J* = 12.0 Hz, 1H),

1.02 (app. dt,  $J = 12.8, 3.3$  Hz, 1H), 0.91 (d, 6.5 Hz, 3H);  $^{13}\text{C}$  NMR (125 MHz,  $\text{CDCl}_3$ , 25 °C)  $\delta$  170.5, 139.6, 123.6, 65.7, 60.0, 55.4, 45.9, 45.8, 40.6, 38.7, 37.8, 35.4, 35.0, 34.3, 25.9, 23.4, 22.7, 22.0, 21.6; HRMS (ESI/methanol)  $m/z$  calcd for  $\text{C}_{19}\text{H}_{28}\text{N}_2\text{ONa}$  ( $M + \text{Na}$ ) $^+$ : 323.2099, found: 323.2106, TLC (10 % MeOH in  $\text{CHCl}_3$ )  $R_f = 0.33$  (UV or  $\text{KMnO}_4$ );  $[\alpha]_{\text{D}}^{24} = +310$  ( $c$  1.32,  $\text{CHCl}_3$ ).

- 
- <sup>1</sup> A. Pangborn, M. Giardello, R. Grubbs, R. Rosen, F. Timmers *Organometallics* 1996, **15**, 1518–1520.
- <sup>2</sup> W. Still, M. Khan, A. Mitra *J. Org. Chem.* 1978, **43**, 2923–2925.
- <sup>3</sup> R. K. Dieter, C. W. Alexander, L. E. Nice *Tetrahedron*, 2000, **56**, 2767–2778.
- <sup>4</sup> S. P. Waters, X. Cheng *Org. Lett.* 2010, **12**, 205-207.
- <sup>5</sup> B. B. Liao, M. D. Shair *J. Am. Chem. Soc.* 2010, **132**, 9594–9595.

(500 MHz, in CDCl<sub>3</sub> at 65 °C)

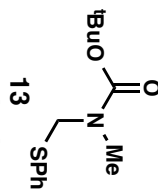

7.496  
7.481  
7.284  
7.269  
7.260

4.746

2.899

1.331

Samame, Owens and Rychnovsky

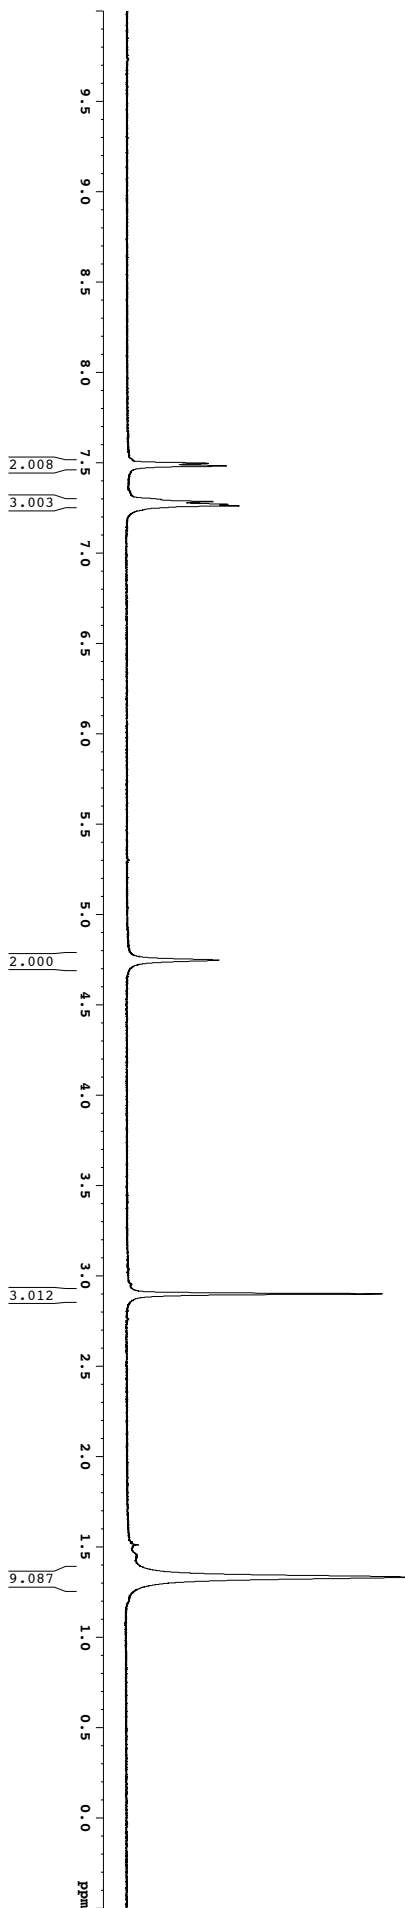

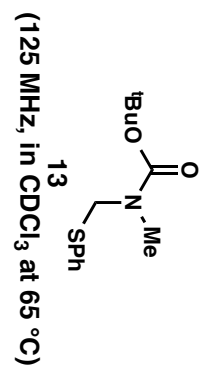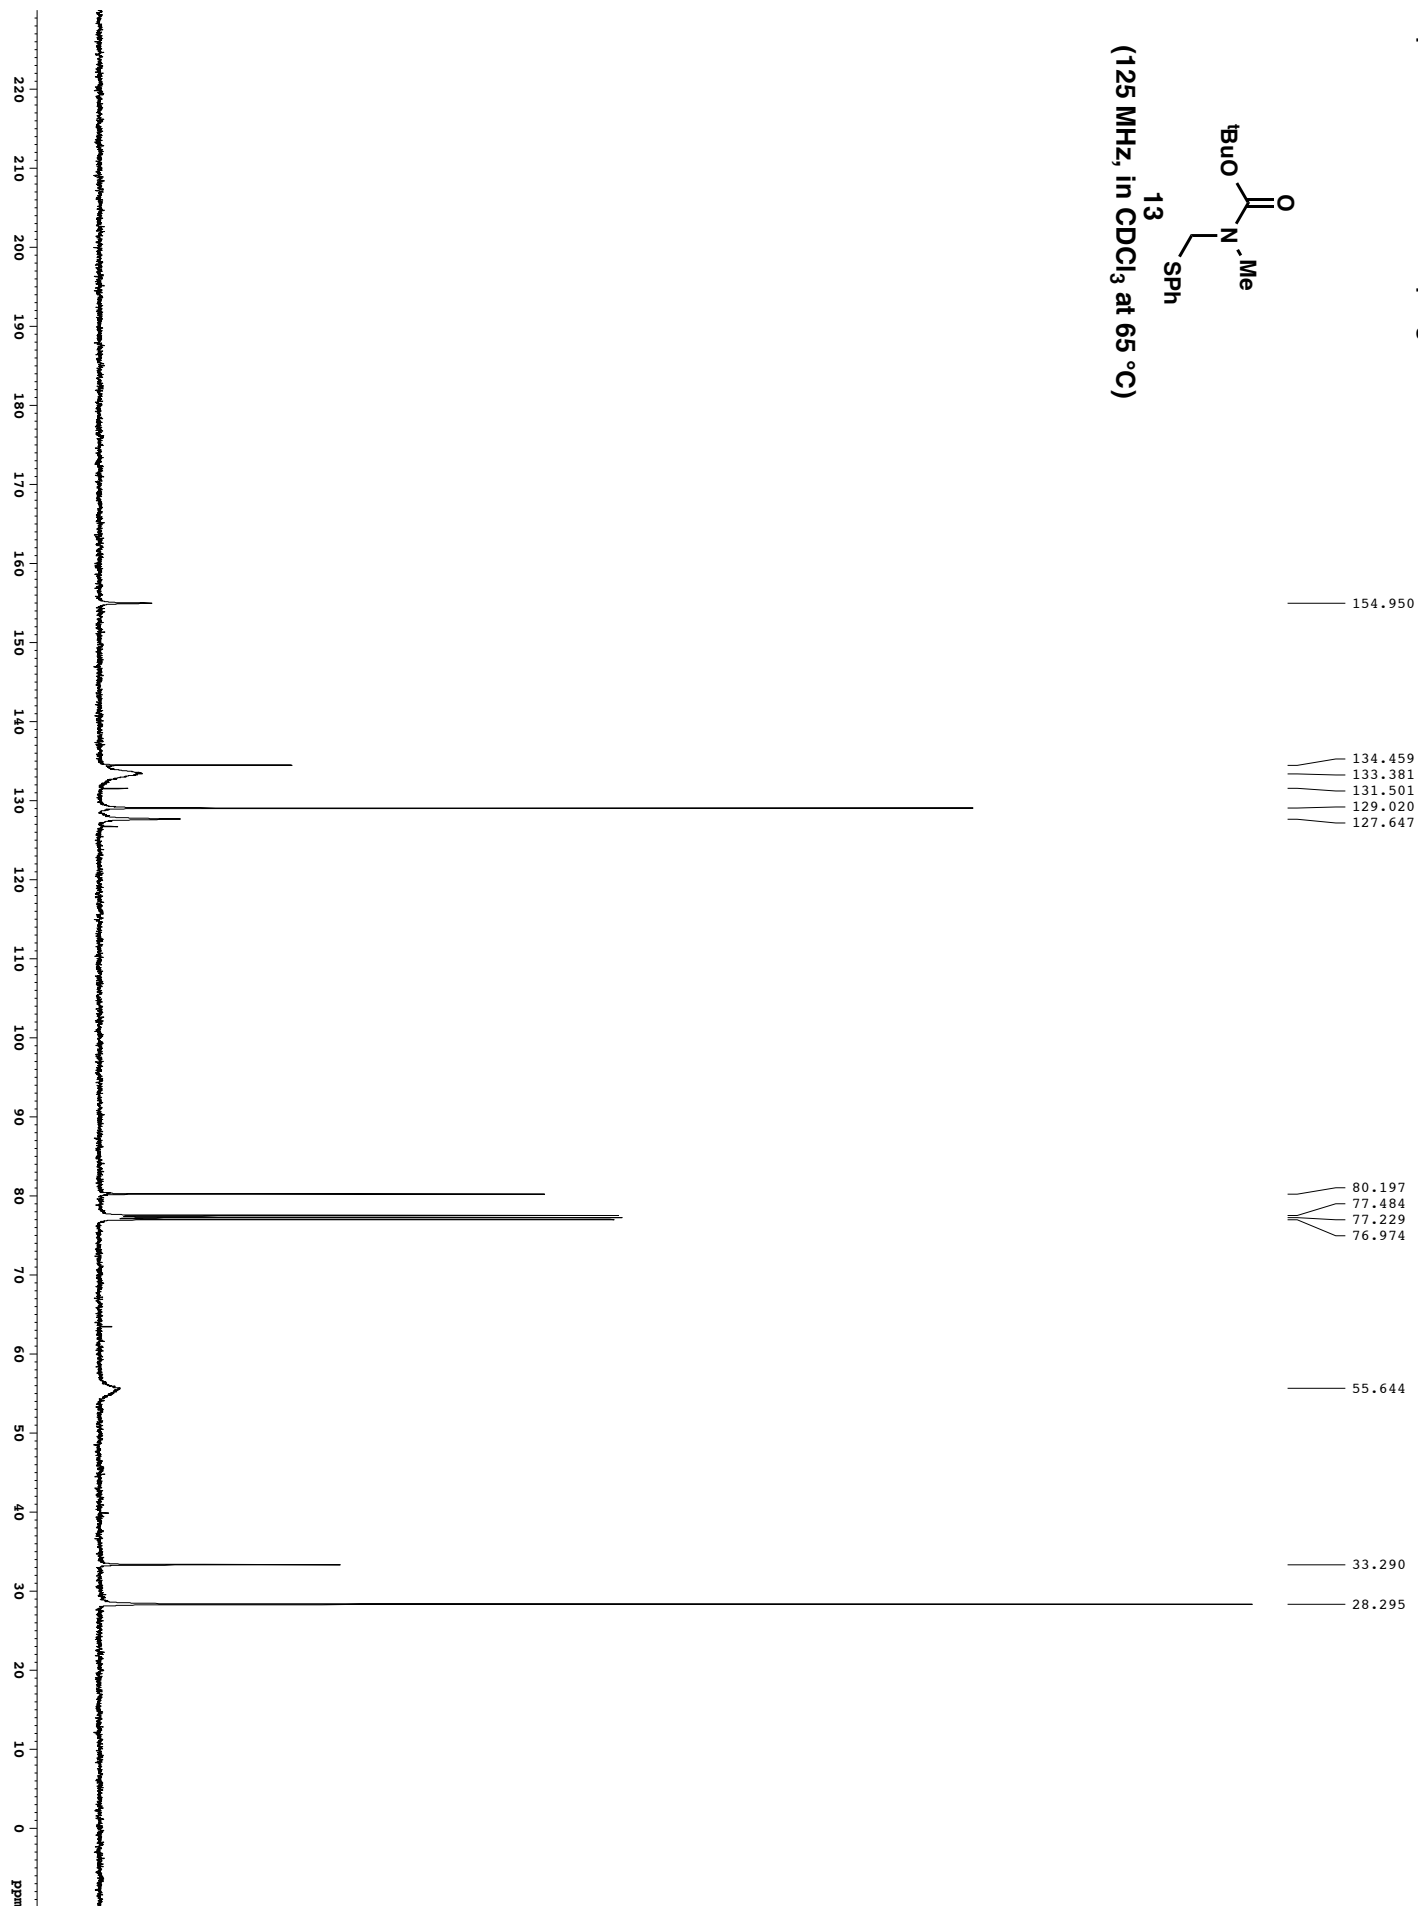

<sup>1</sup>H spectrum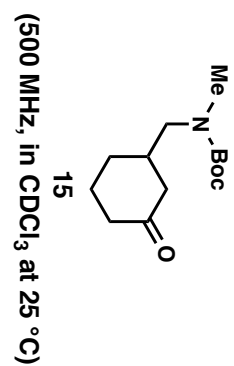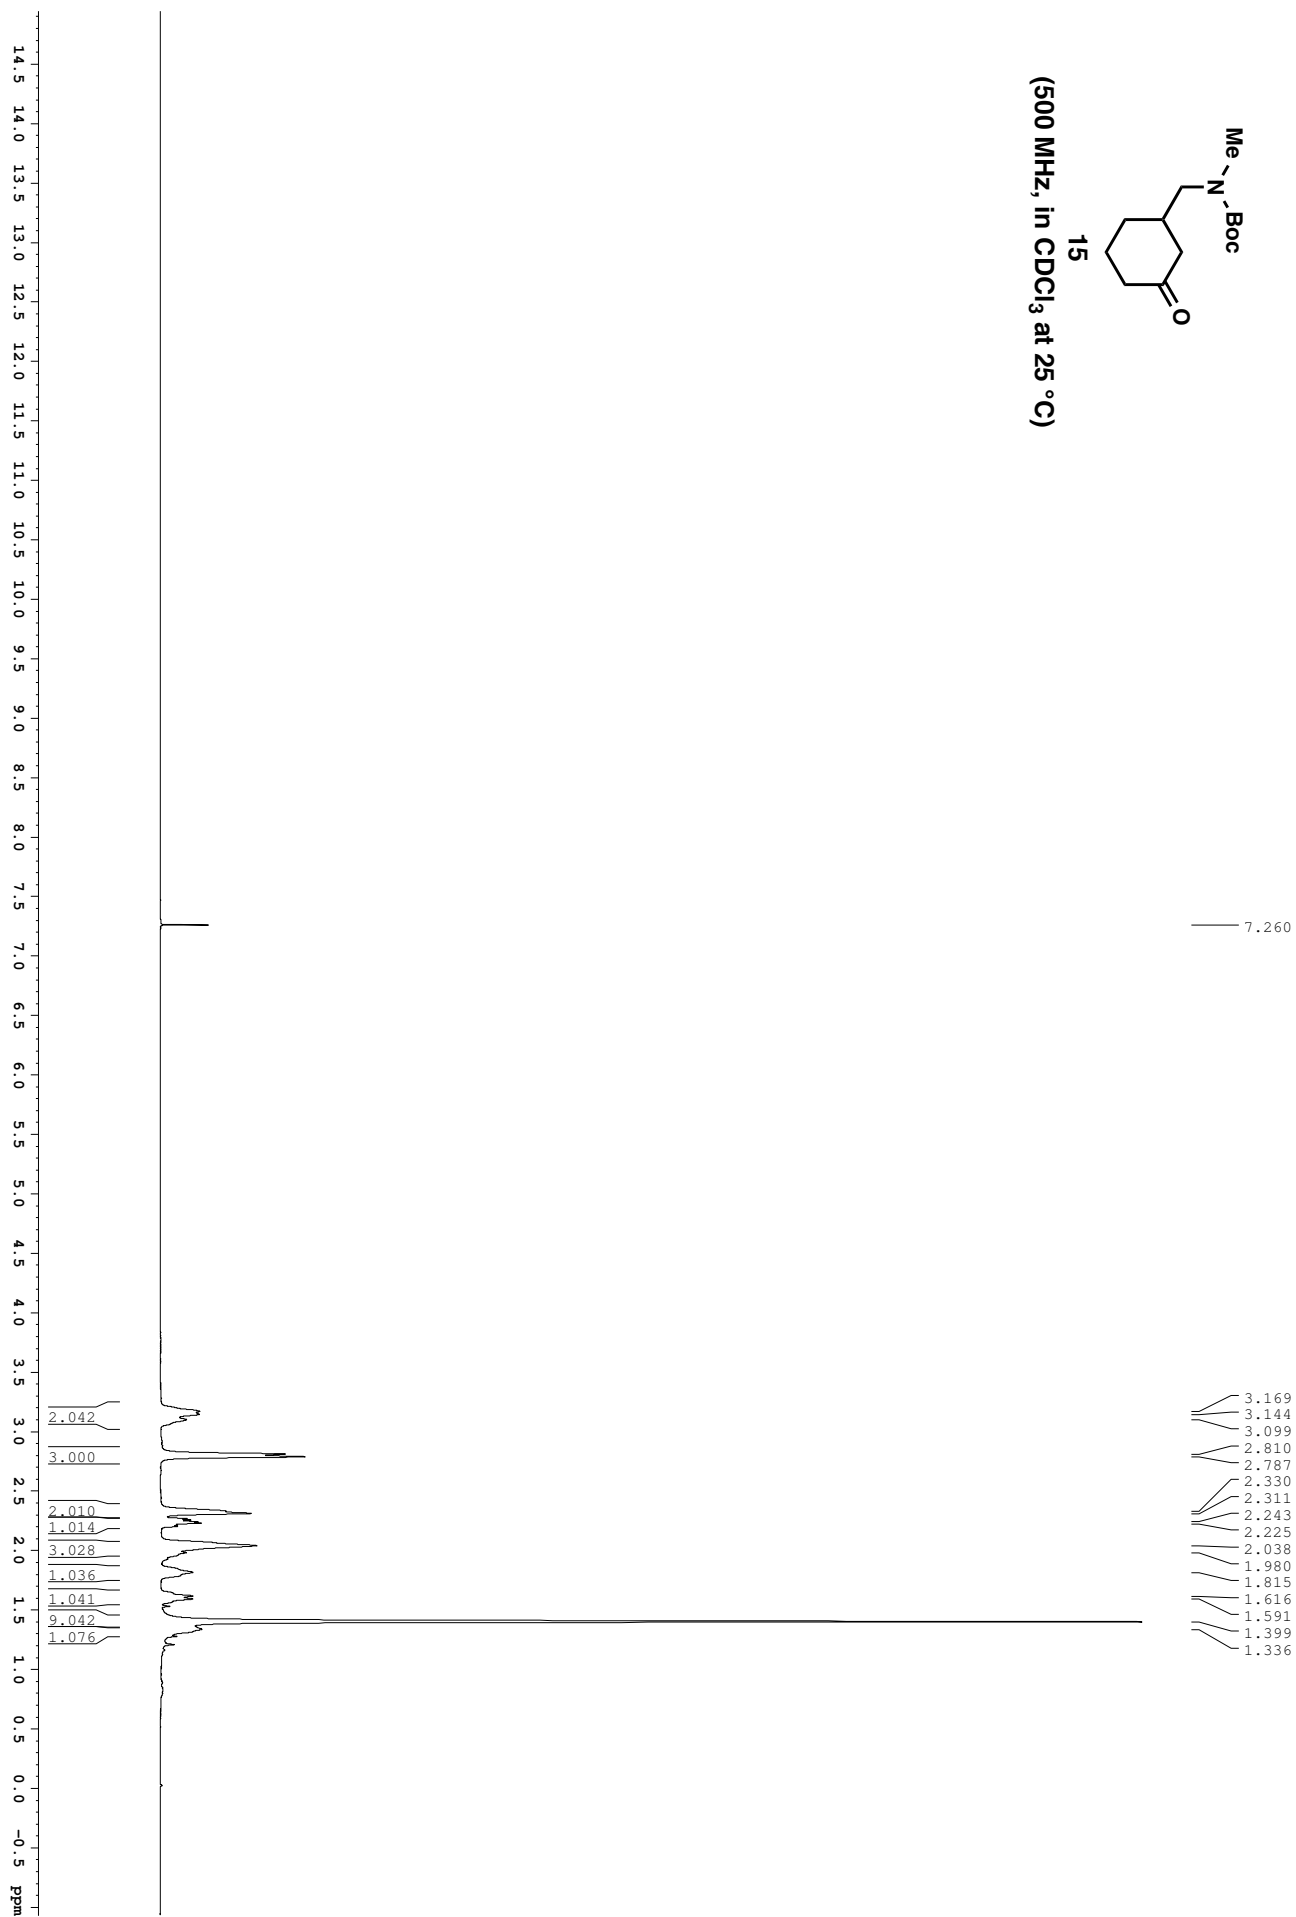



Z-restored spin-echo  $^{13}\text{C}$  spectrum with  $^1\text{H}$  decoupling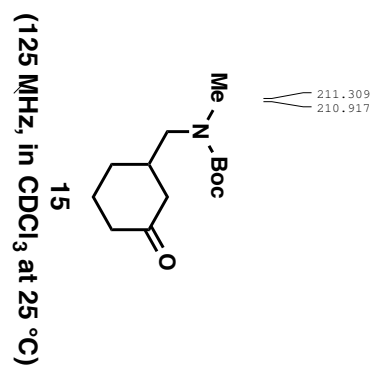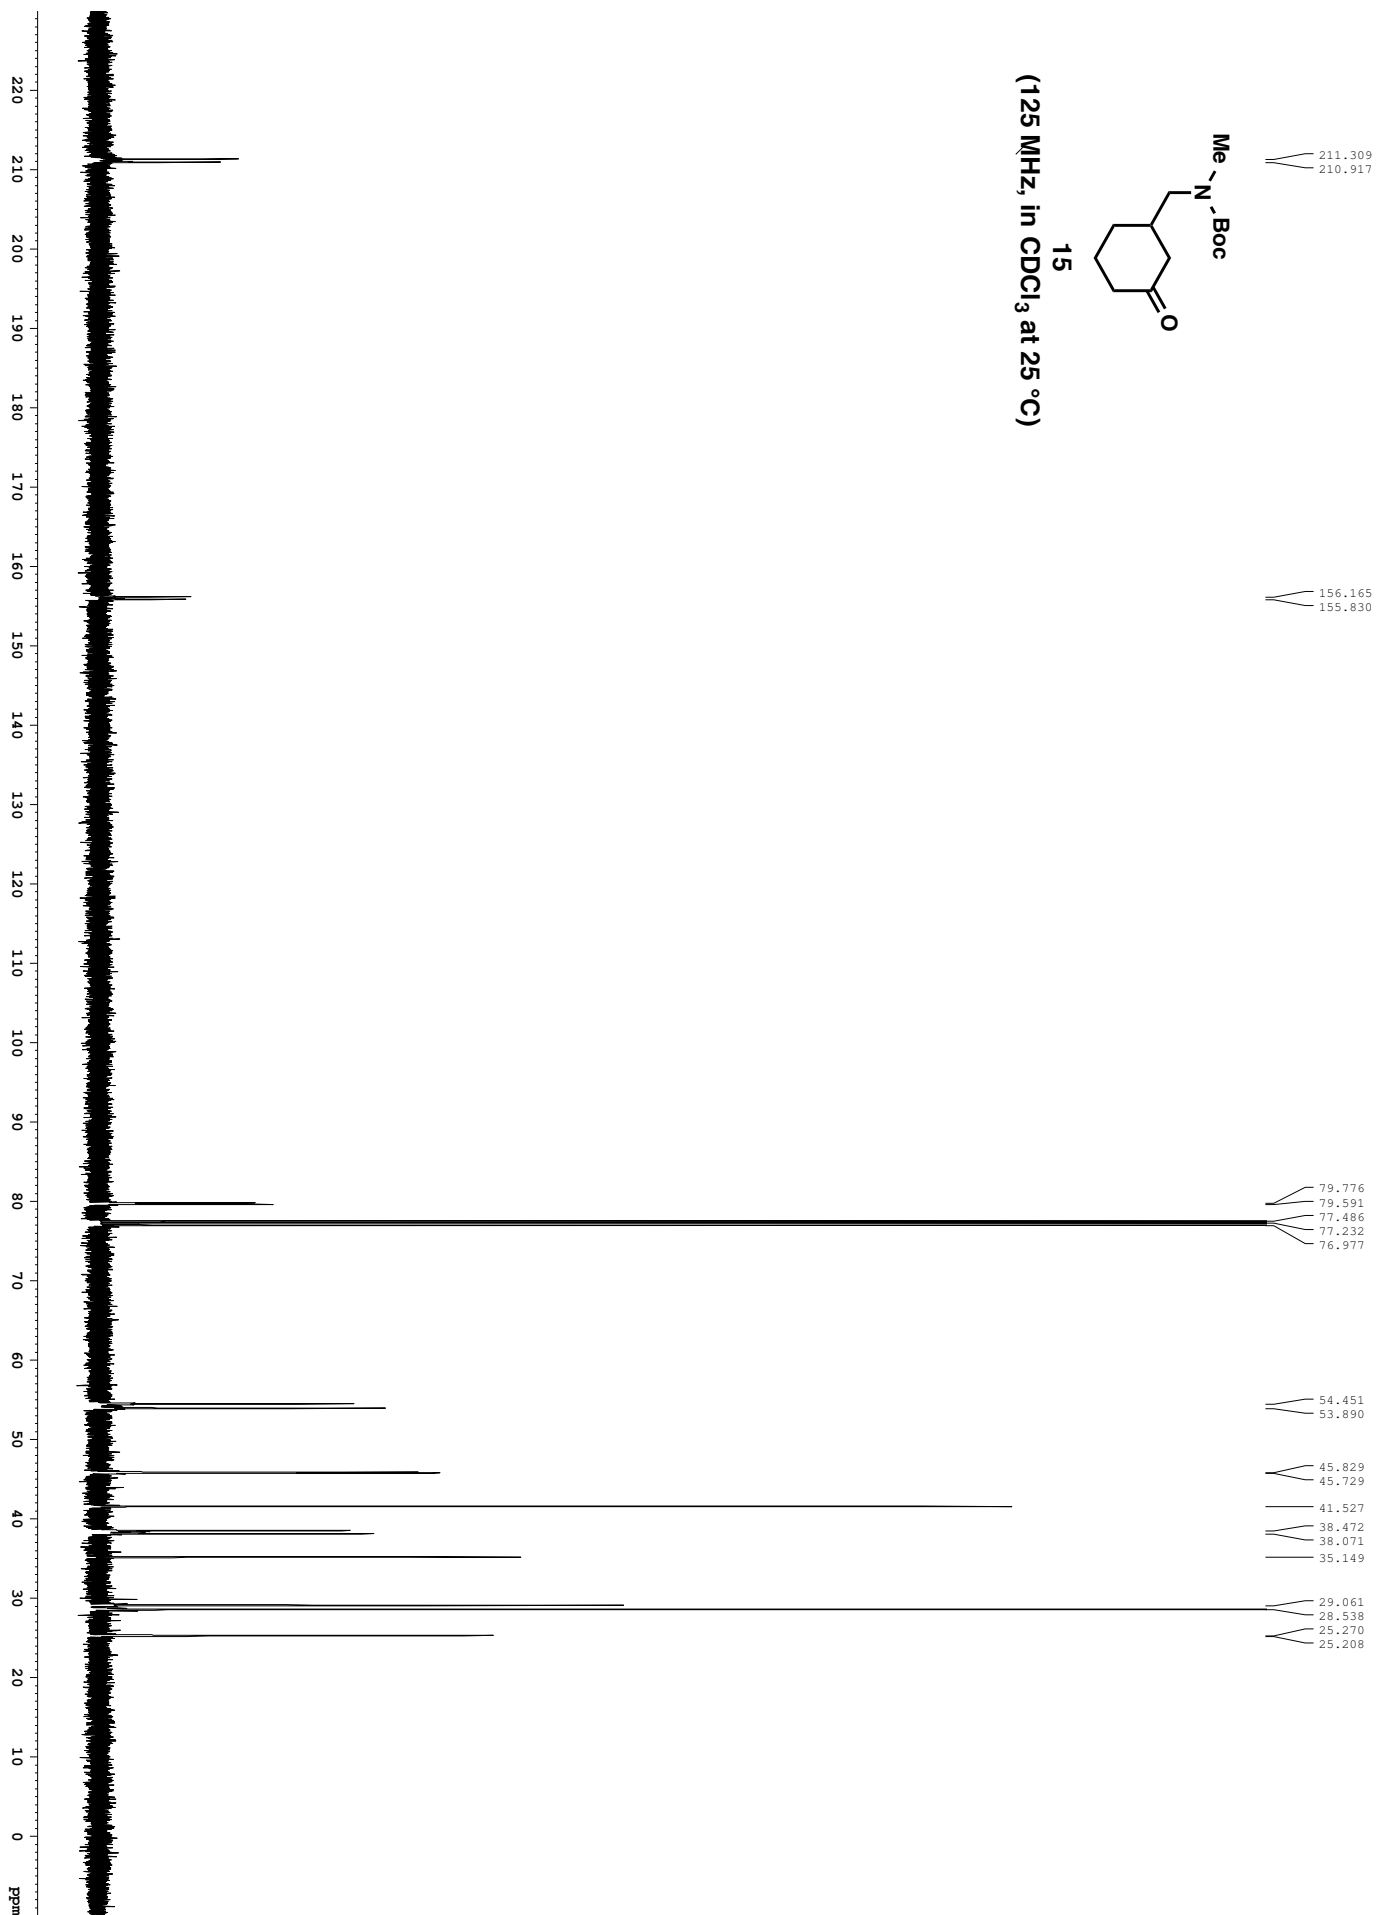

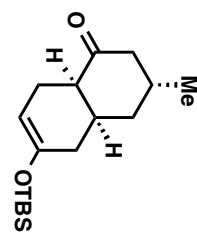

(500 MHz, in CDCl<sub>3</sub> at 25 °C)

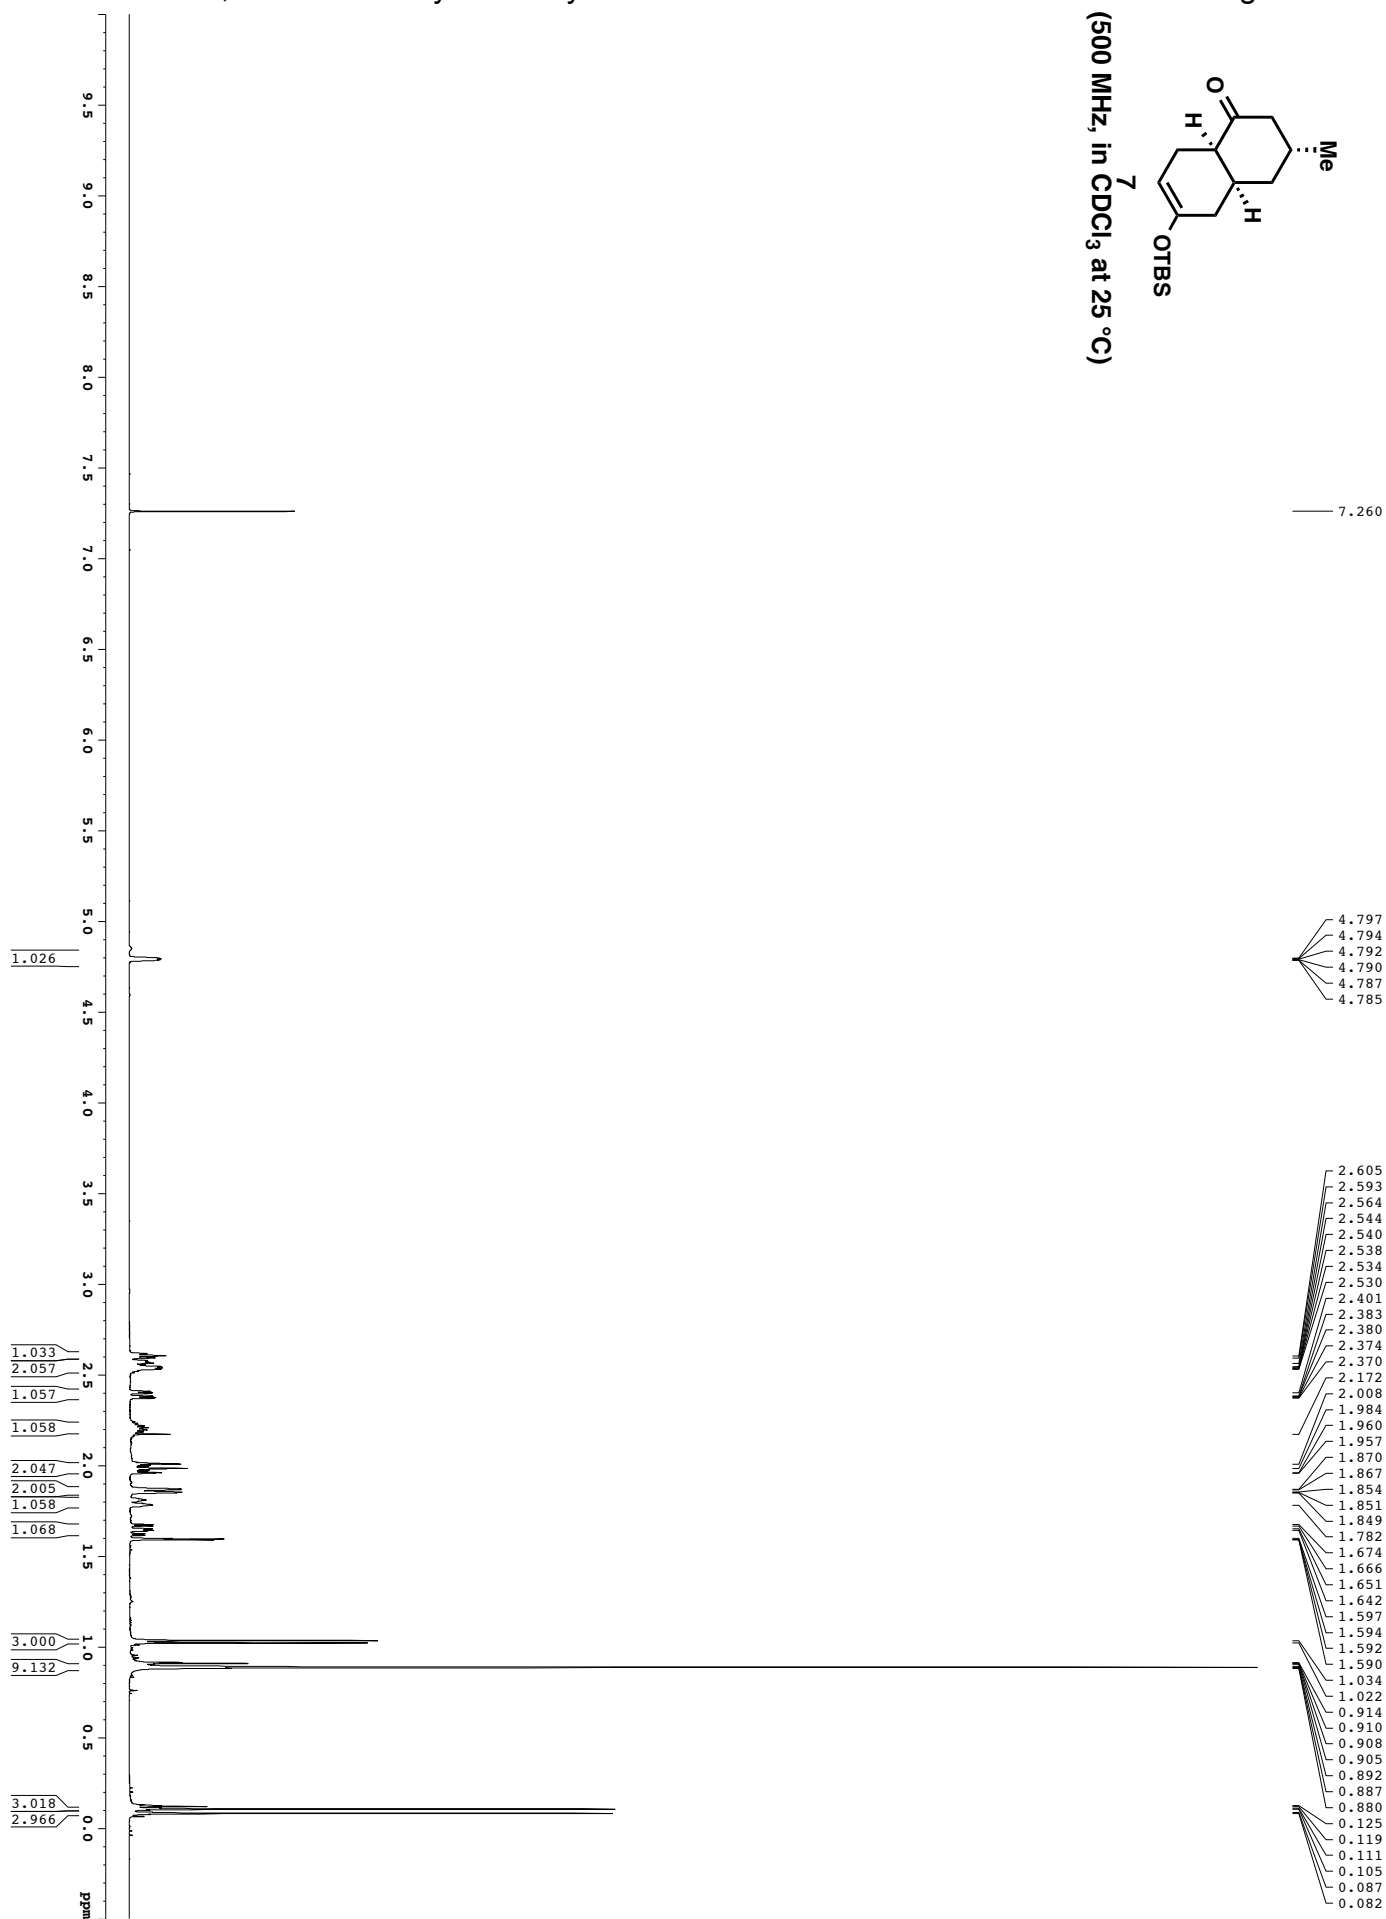

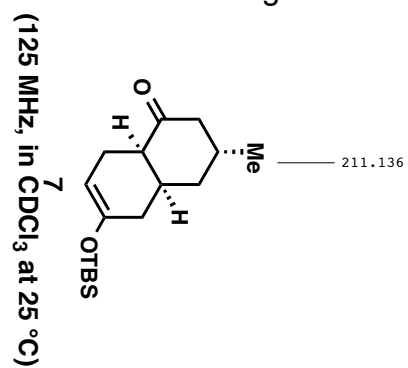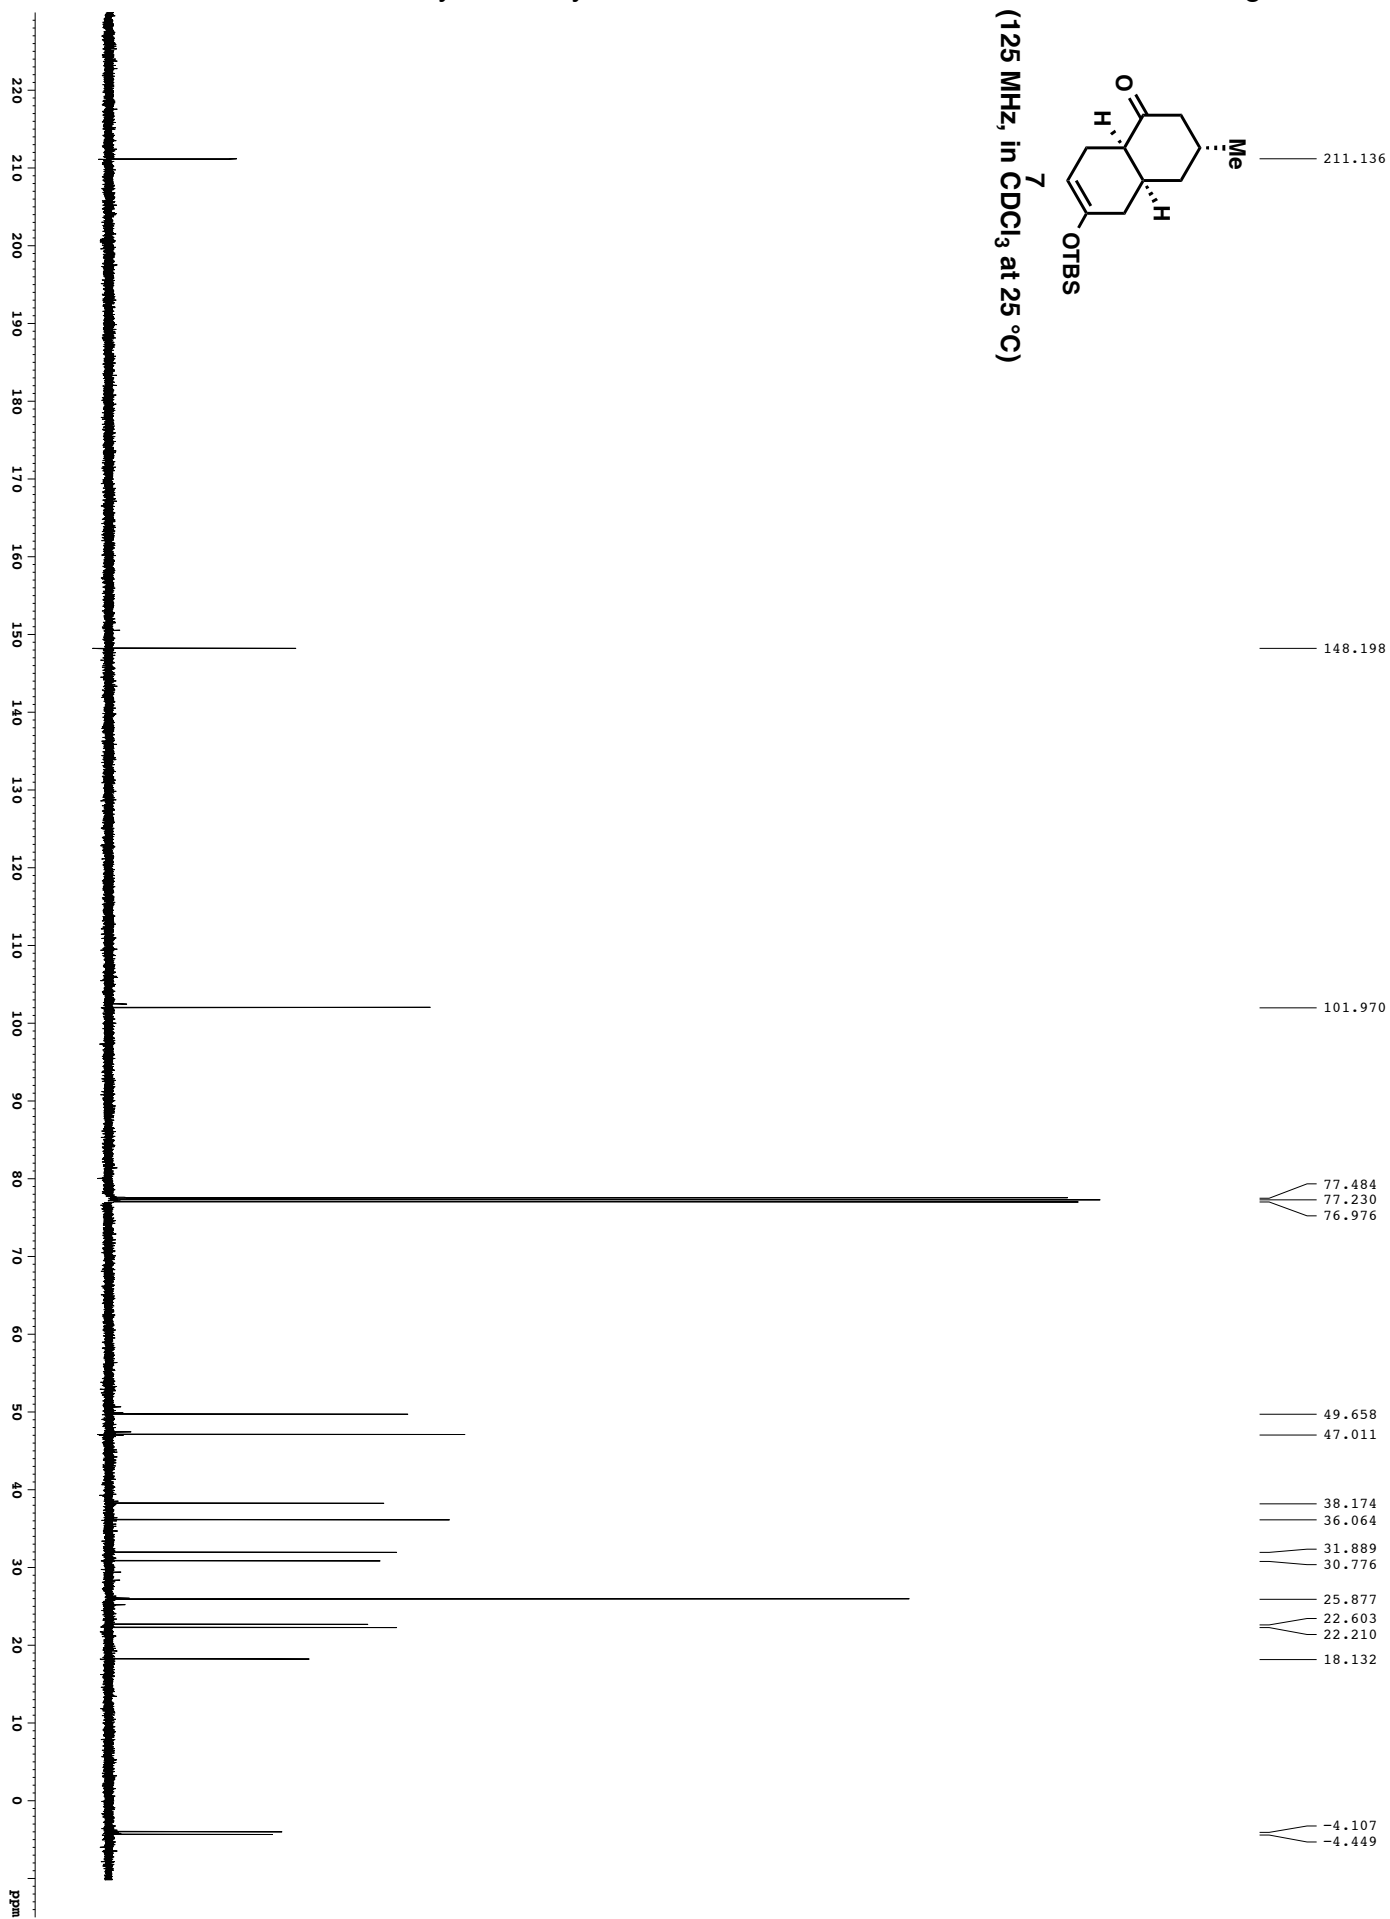

(500 MHz, in CDCl<sub>3</sub> at 25 °C)

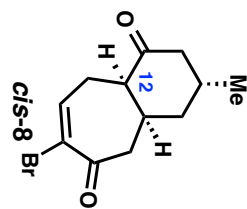

7.260  
7.223  
7.217  
7.205  
7.195

2.691  
2.669  
2.520  
2.504  
2.486  
2.462  
2.431  
2.407  
2.387  
2.374  
2.354  
2.067  
2.042  
2.016  
1.891  
1.879  
1.870  
1.820  
1.792  
1.744  
1.737  
1.715  
1.694  
1.687  
1.027  
1.014  
0.969

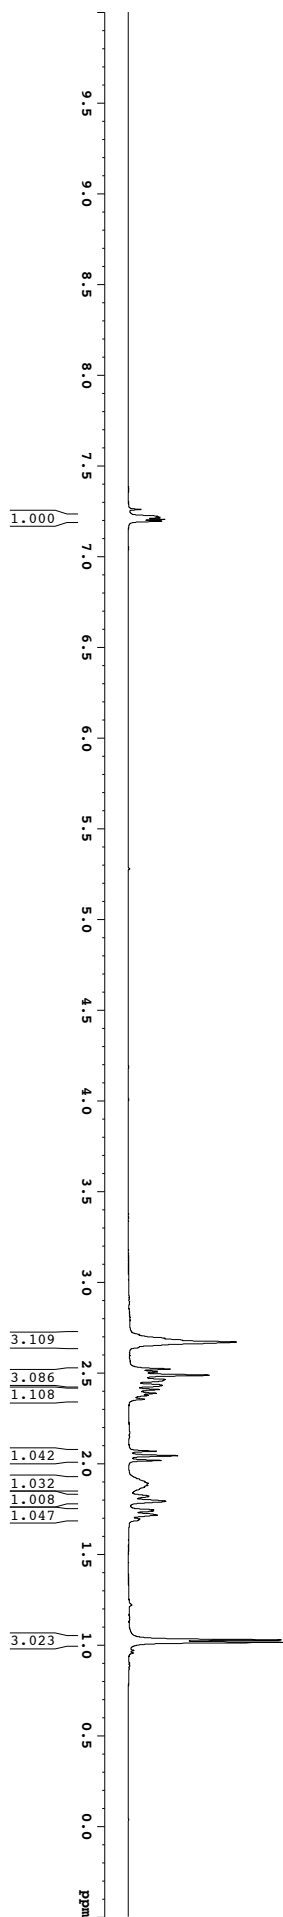

Z-restored spin-echo  $^{13}\text{C}$  spectrum with  $^1\text{H}$  decoupling(125 MHz, in  $\text{CDCl}_3$  at 25 °C)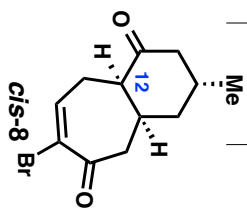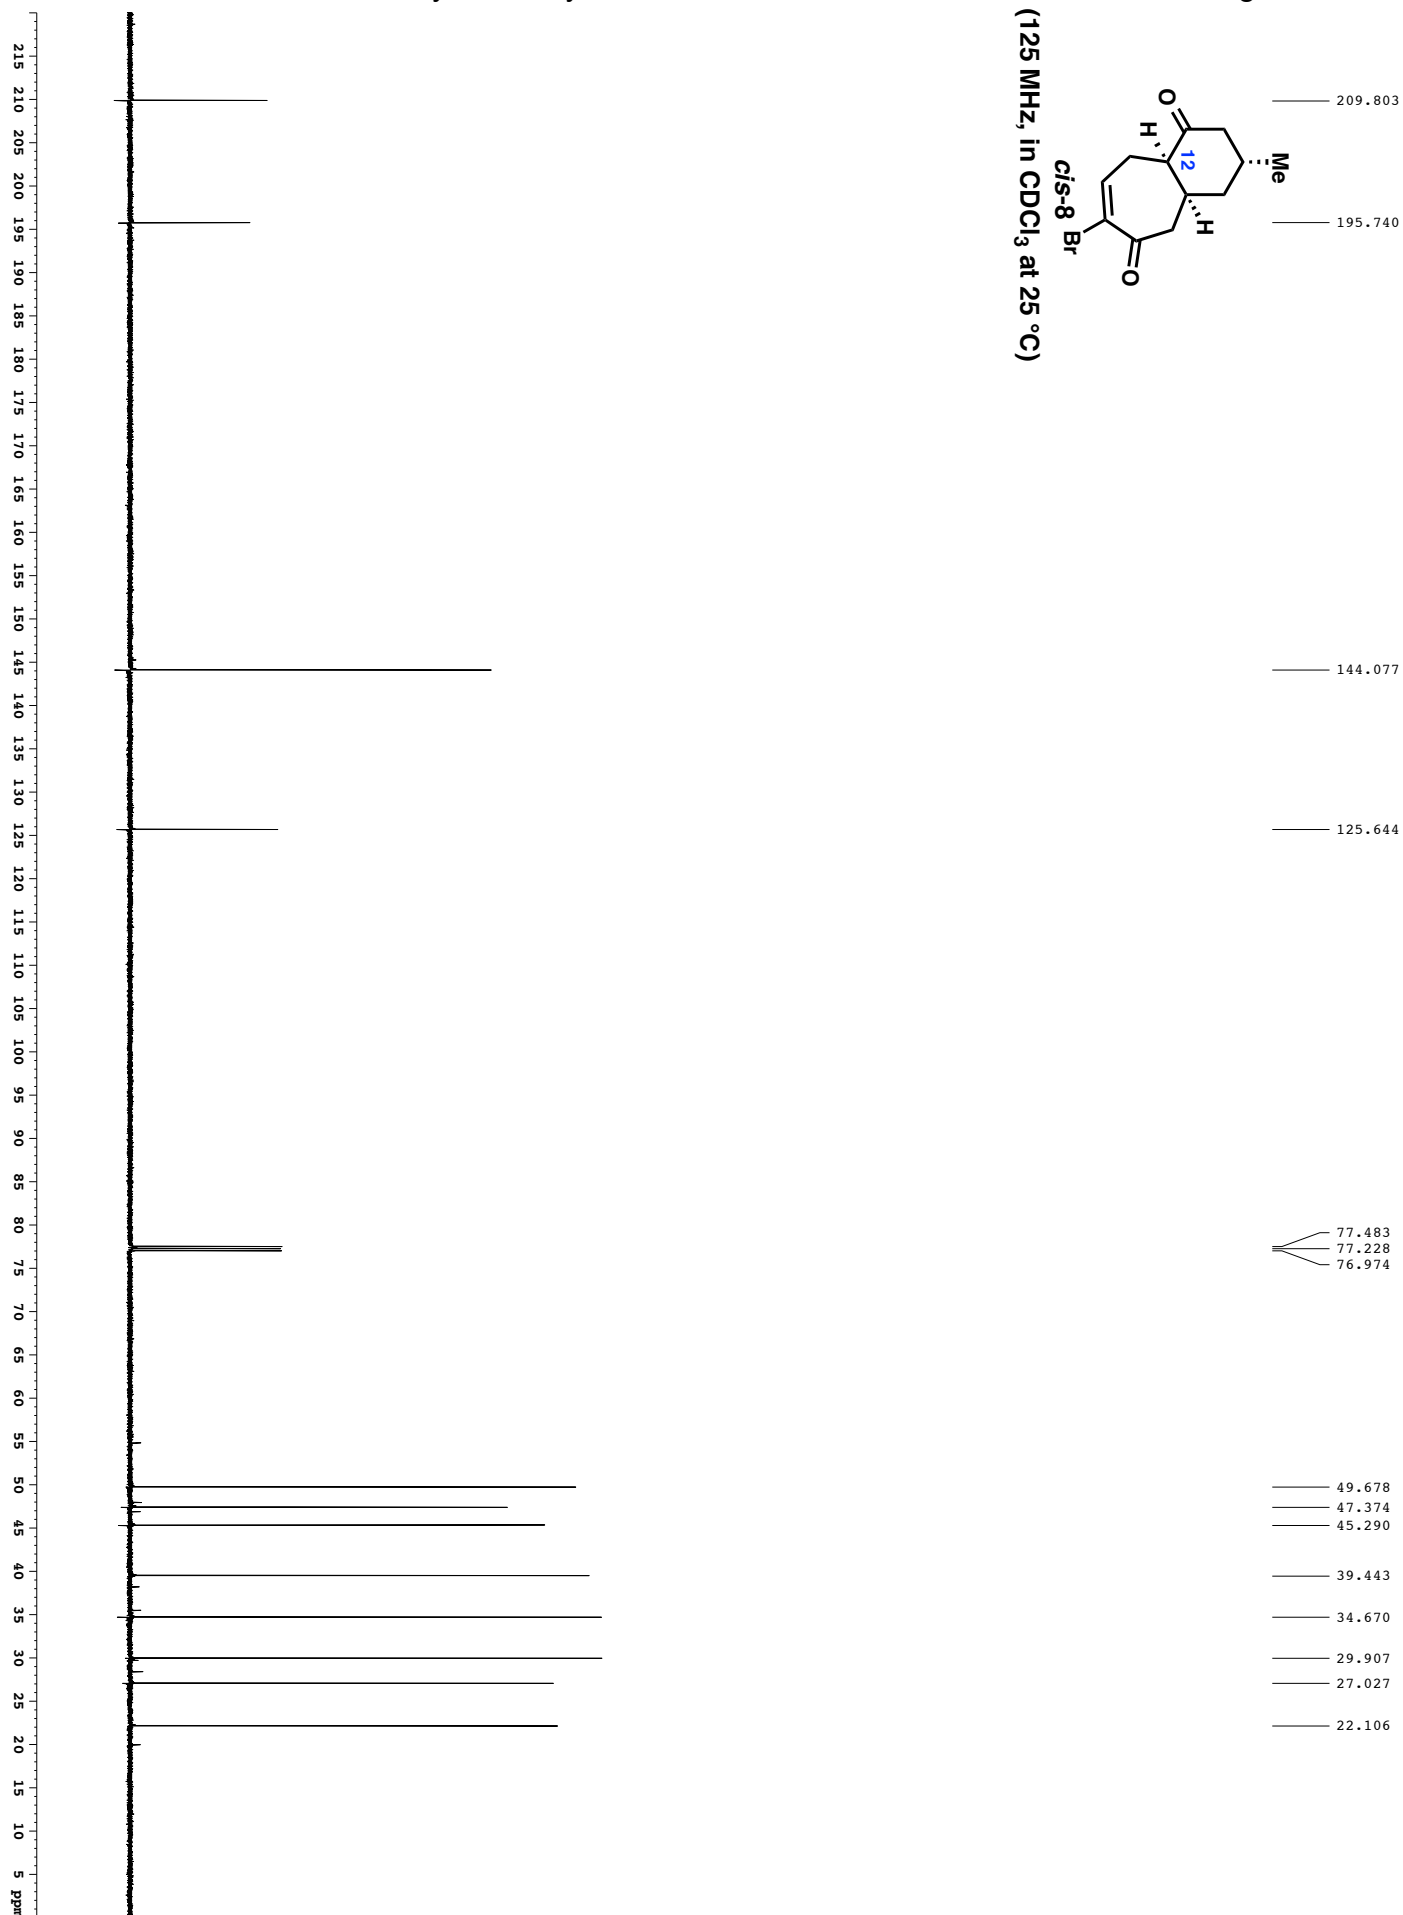

<sup>1</sup>H spectrum

*trans*-8-Br  
(500 MHz, in CDCl<sub>3</sub> at 25 °C)

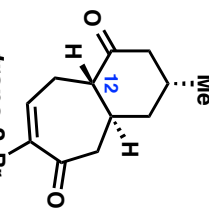

7.260  
7.237  
7.229  
7.221  
7.212

5.288

2.937  
2.925  
2.909  
2.897  
2.853  
2.837  
2.823  
2.807  
2.680  
2.620  
2.609  
2.592  
2.581  
2.515  
2.503  
2.476  
2.465  
2.456  
2.449  
2.440  
2.430  
2.417  
2.405  
2.397  
2.376  
2.248  
2.235  
2.224  
2.215  
2.192  
2.166  
1.972  
1.963  
1.946  
1.937  
1.921  
1.911  
1.699  
1.670  
1.235  
1.048  
1.043  
1.036  
1.030  
1.015  
0.986  
0.972

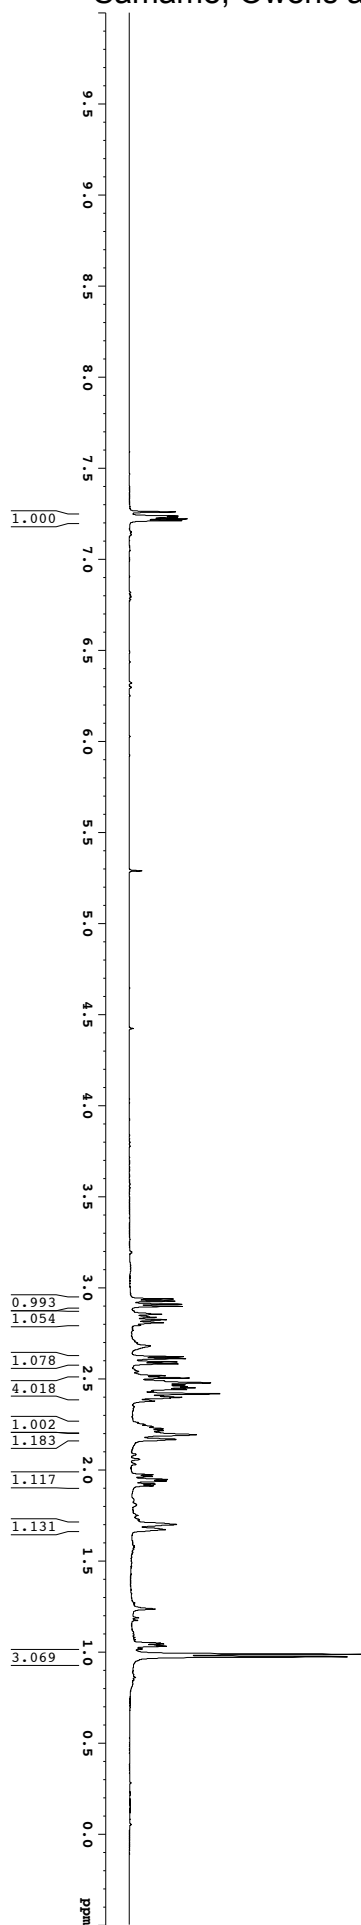

Z-restored spin-echo  $^{13}\text{C}$  spectrum with  $^1\text{H}$  decoupling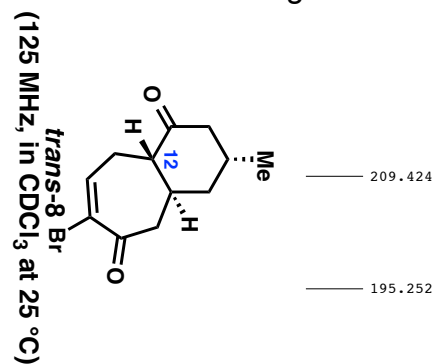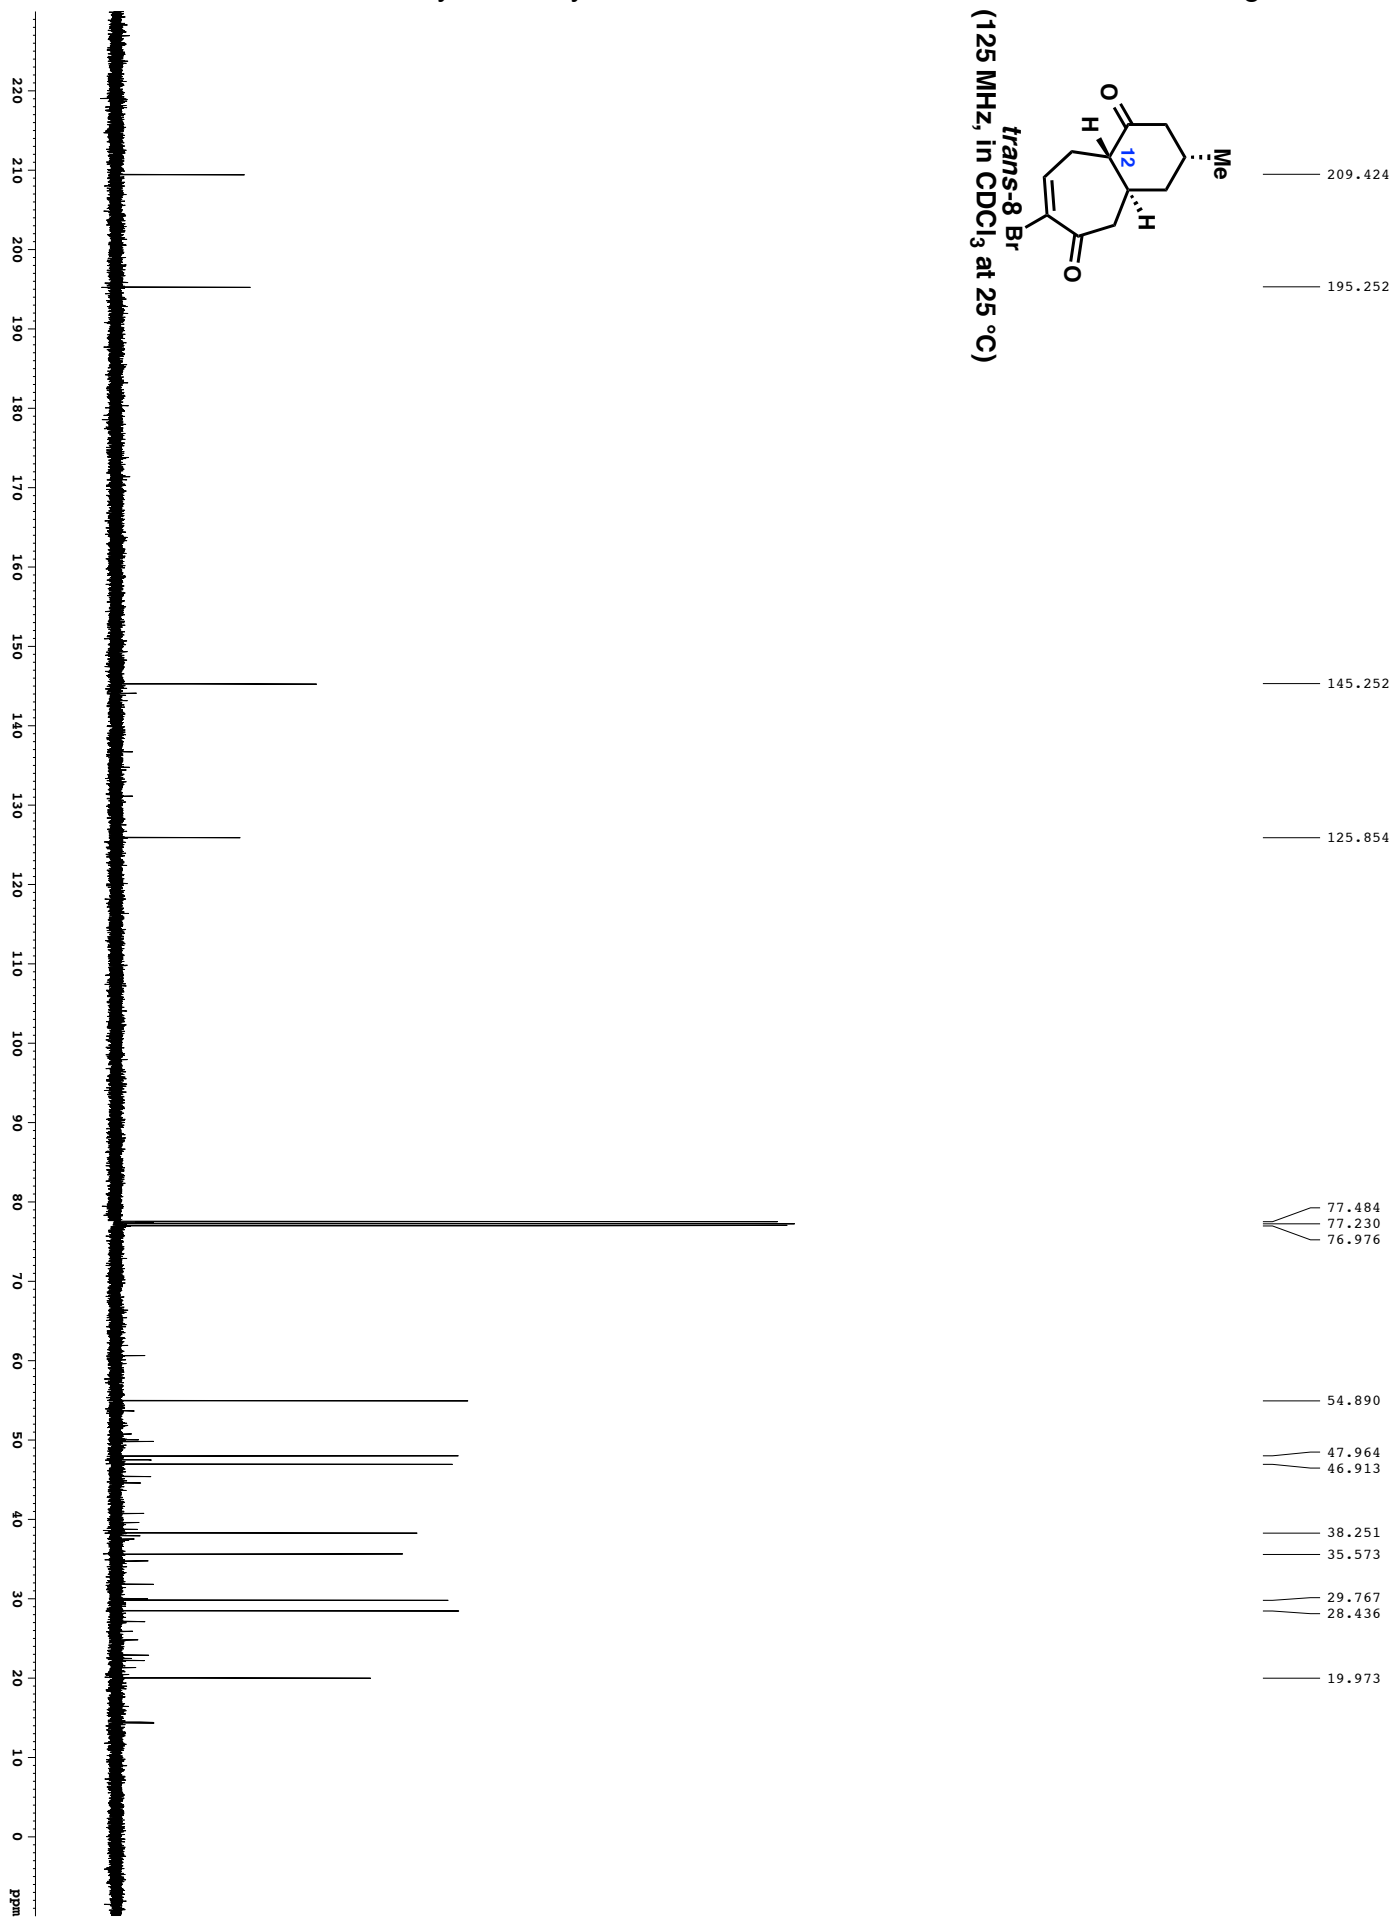

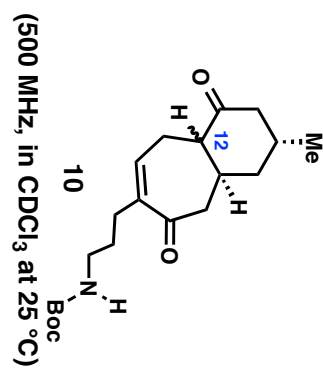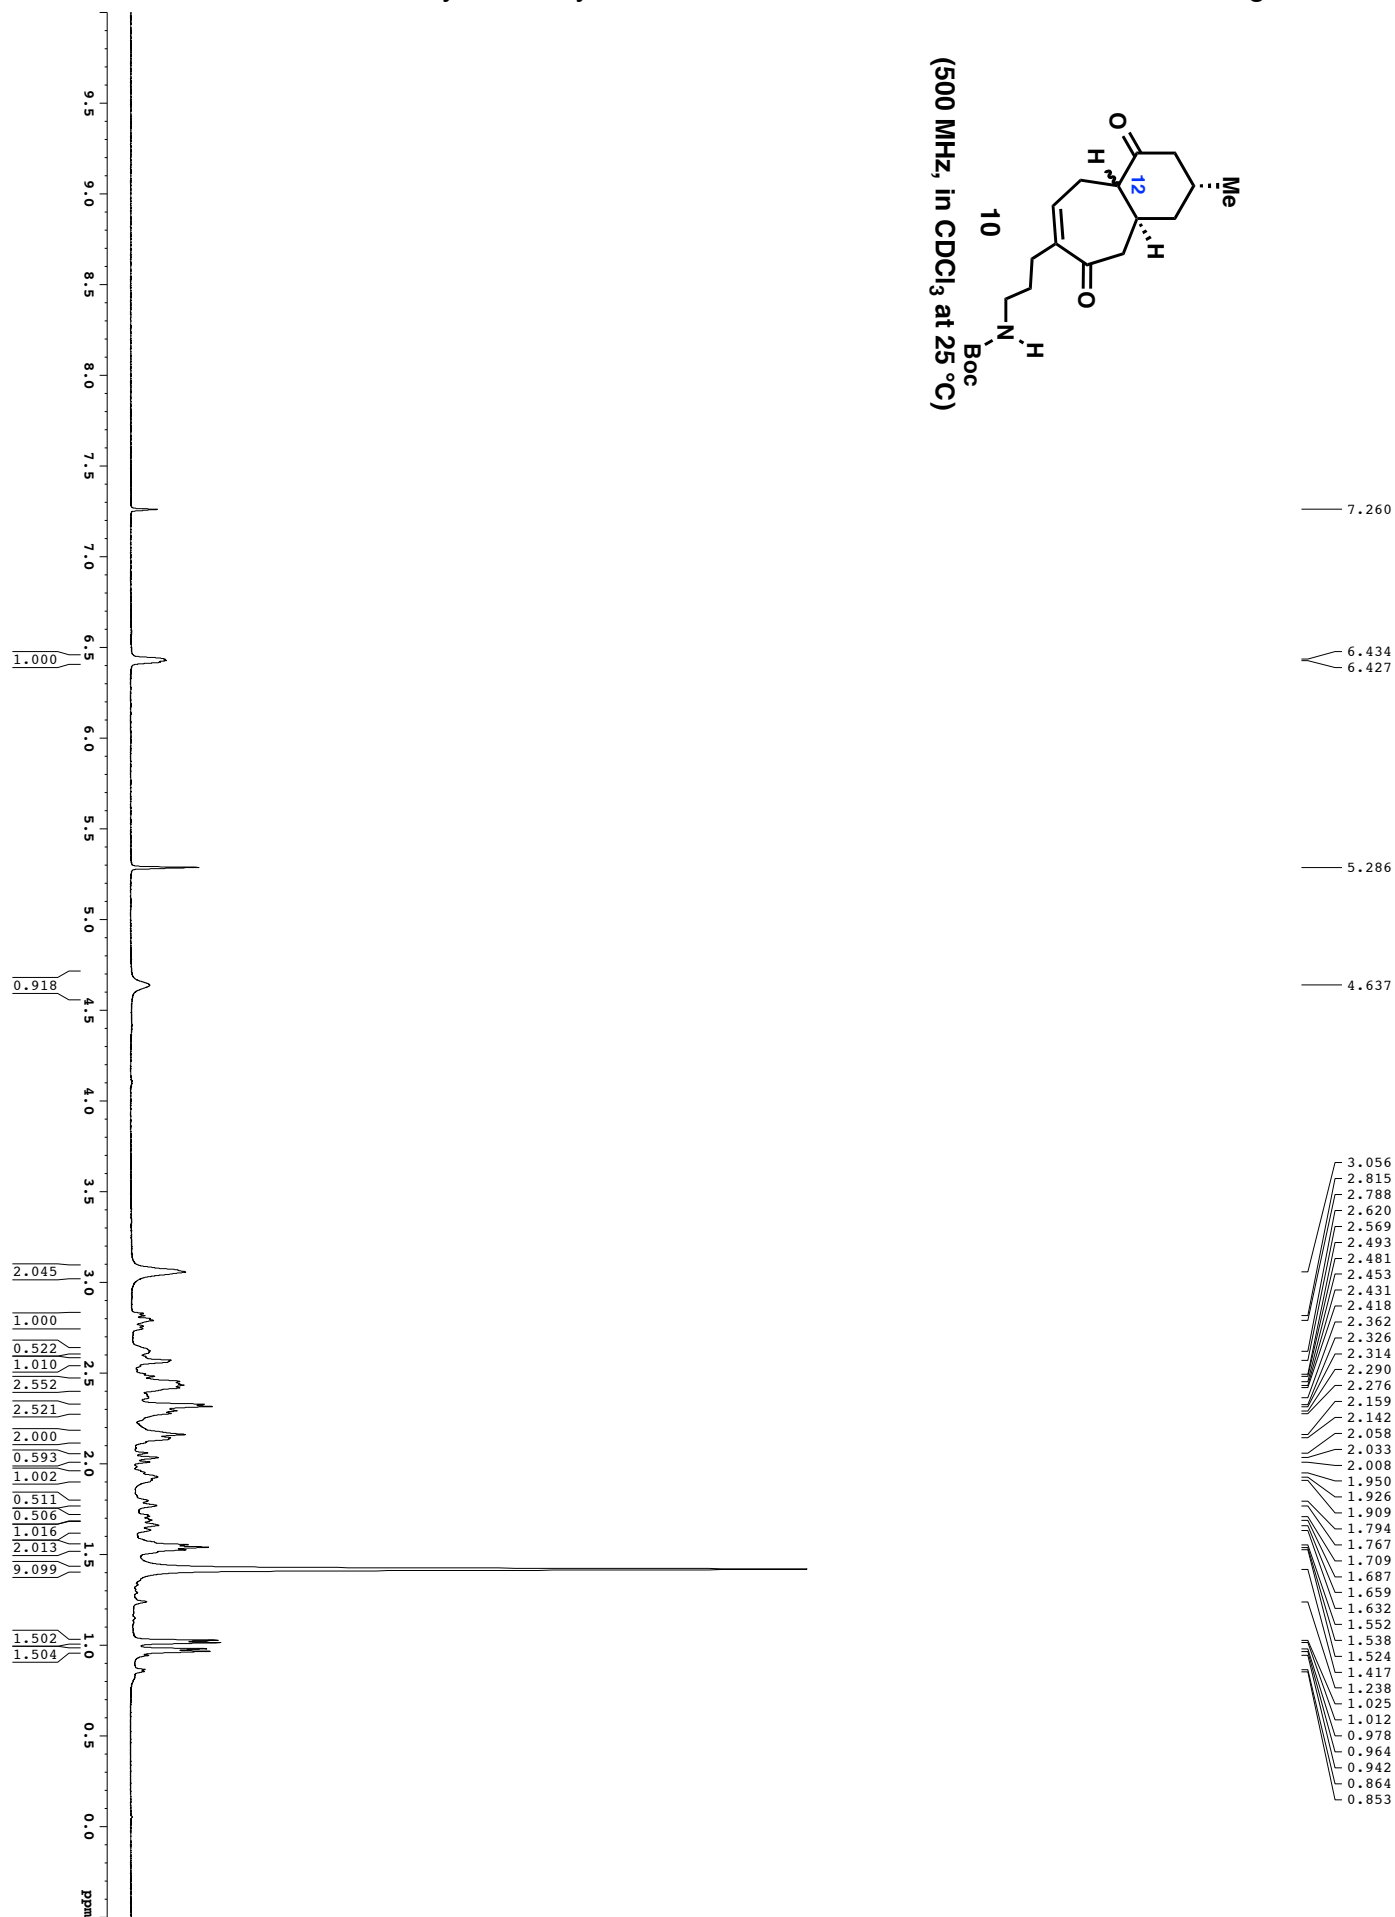



Z-restored spin-echo  $^{13}\text{C}$  spectrum with  $^1\text{H}$  decoupling(125 MHz, in  $\text{CDCl}_3$  at 25 °C)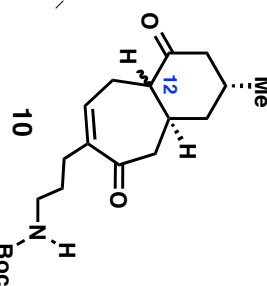211.074  
210.470204.621  
204.119

156.185

142.623

139.535  
138.35179.310  
77.482  
77.228  
76.97455.586  
53.274  
49.767  
49.084  
48.376  
48.030  
47.045  
46.998  
40.478  
40.125  
39.515  
38.966  
38.288  
35.950  
34.751  
32.144  
31.071  
30.475  
29.986  
29.968  
29.916  
29.580  
28.641  
26.712  
25.604  
25.181  
22.912  
22.127  
20.075  
19.362  
14.345220  
210  
200  
190  
180  
170  
160  
150  
140  
130  
120  
110  
100  
90  
80  
70  
60  
50  
40  
30  
20  
10  
0  
ppm

<sup>1</sup>H spectrum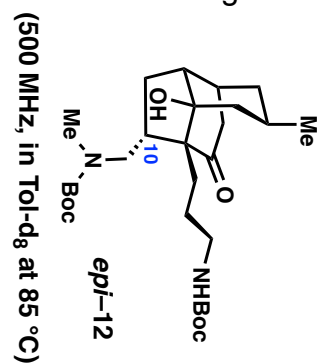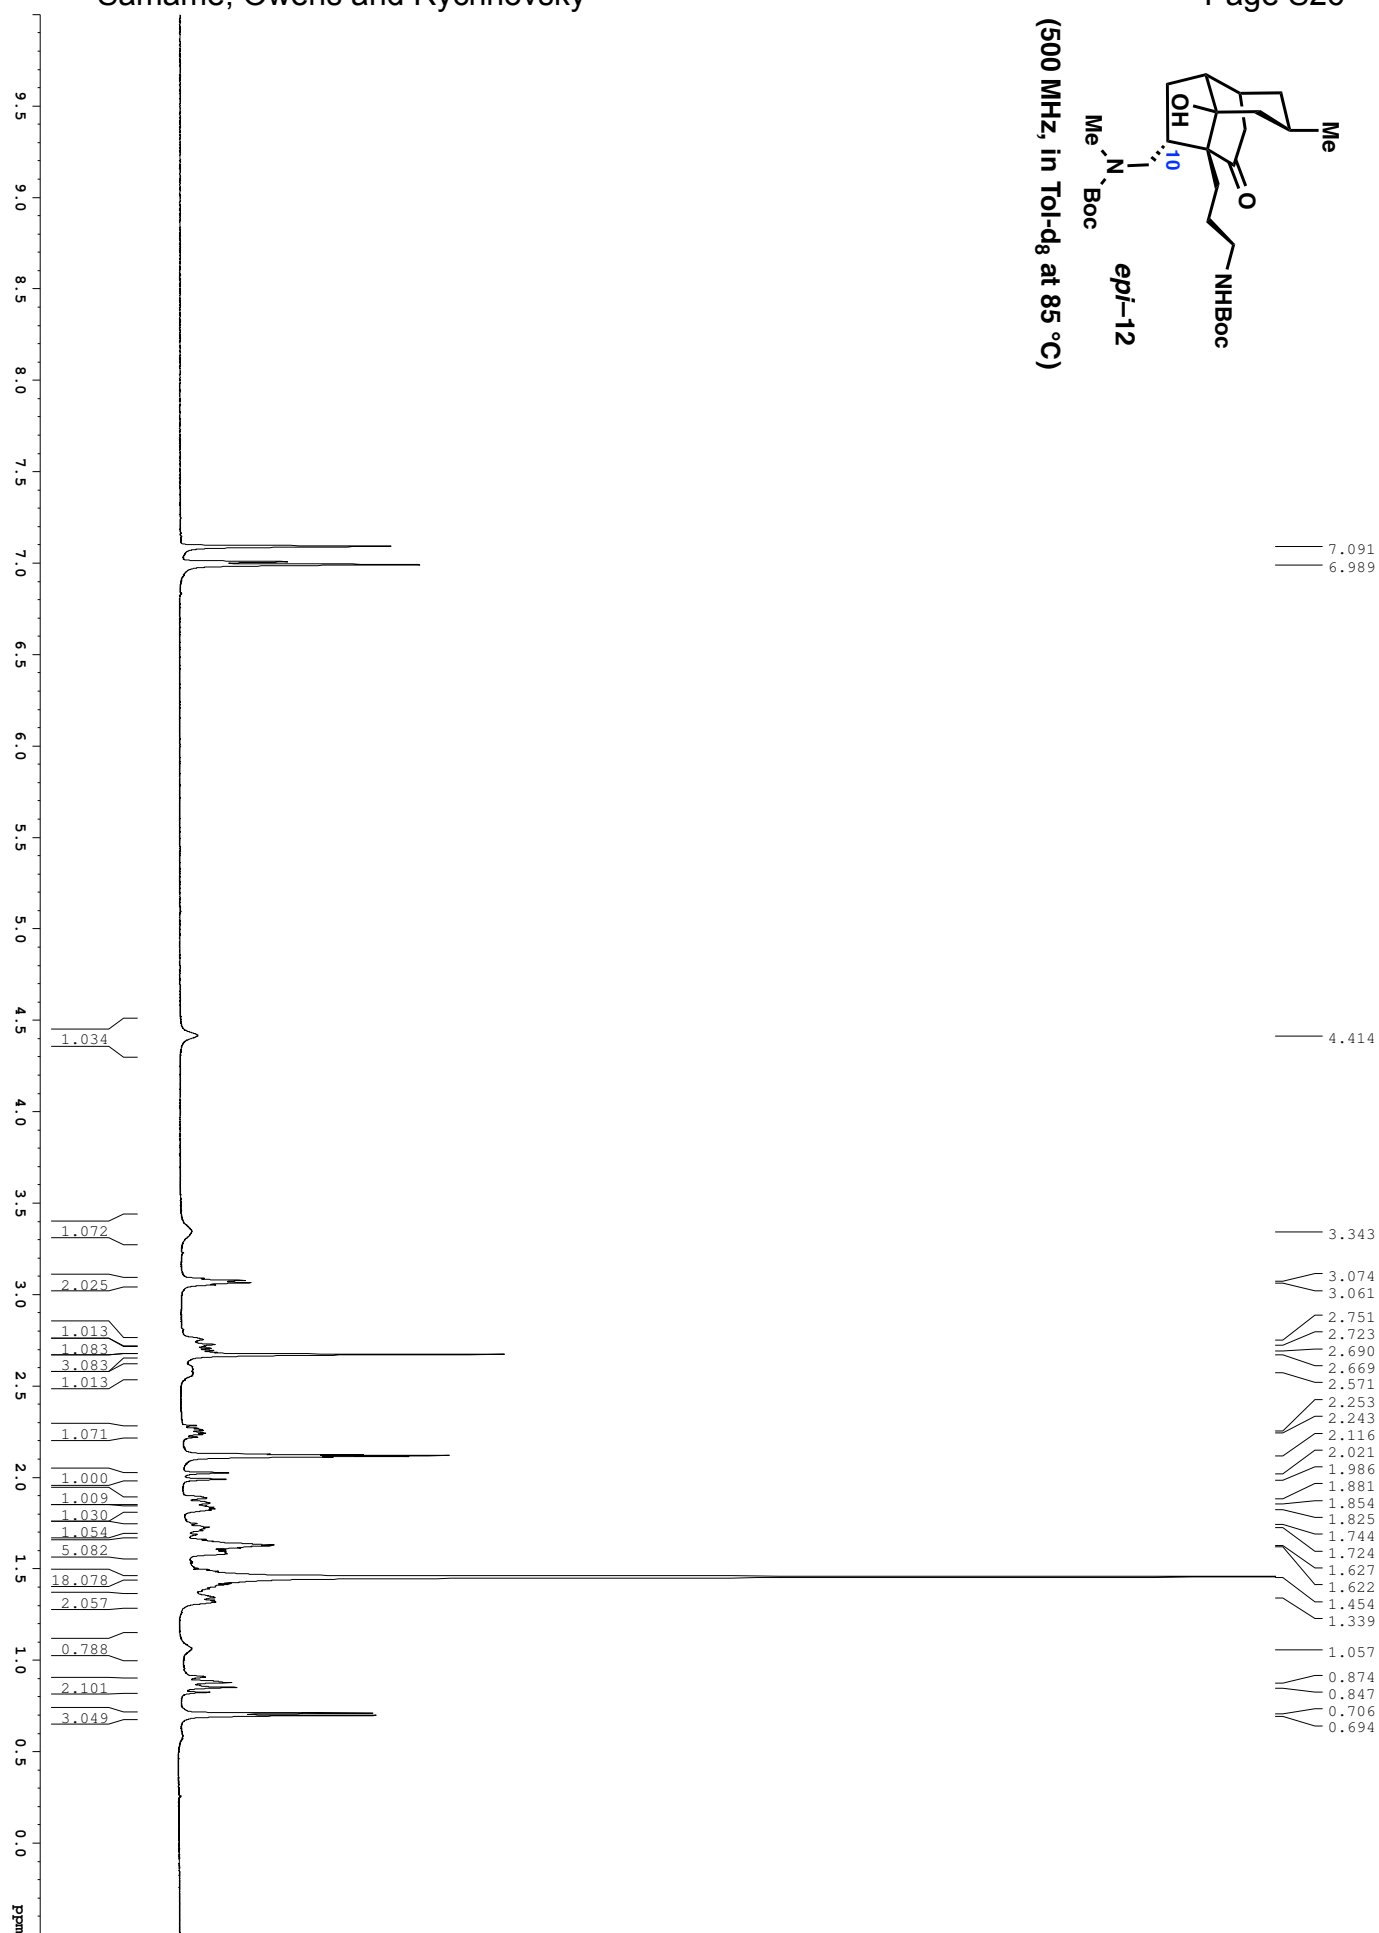

Z-restored spin-echo  $^{13}\text{C}$  spectrum with  $^1\text{H}$  decoupling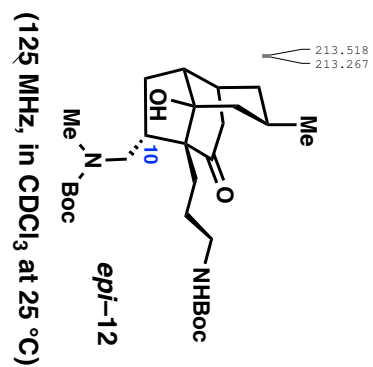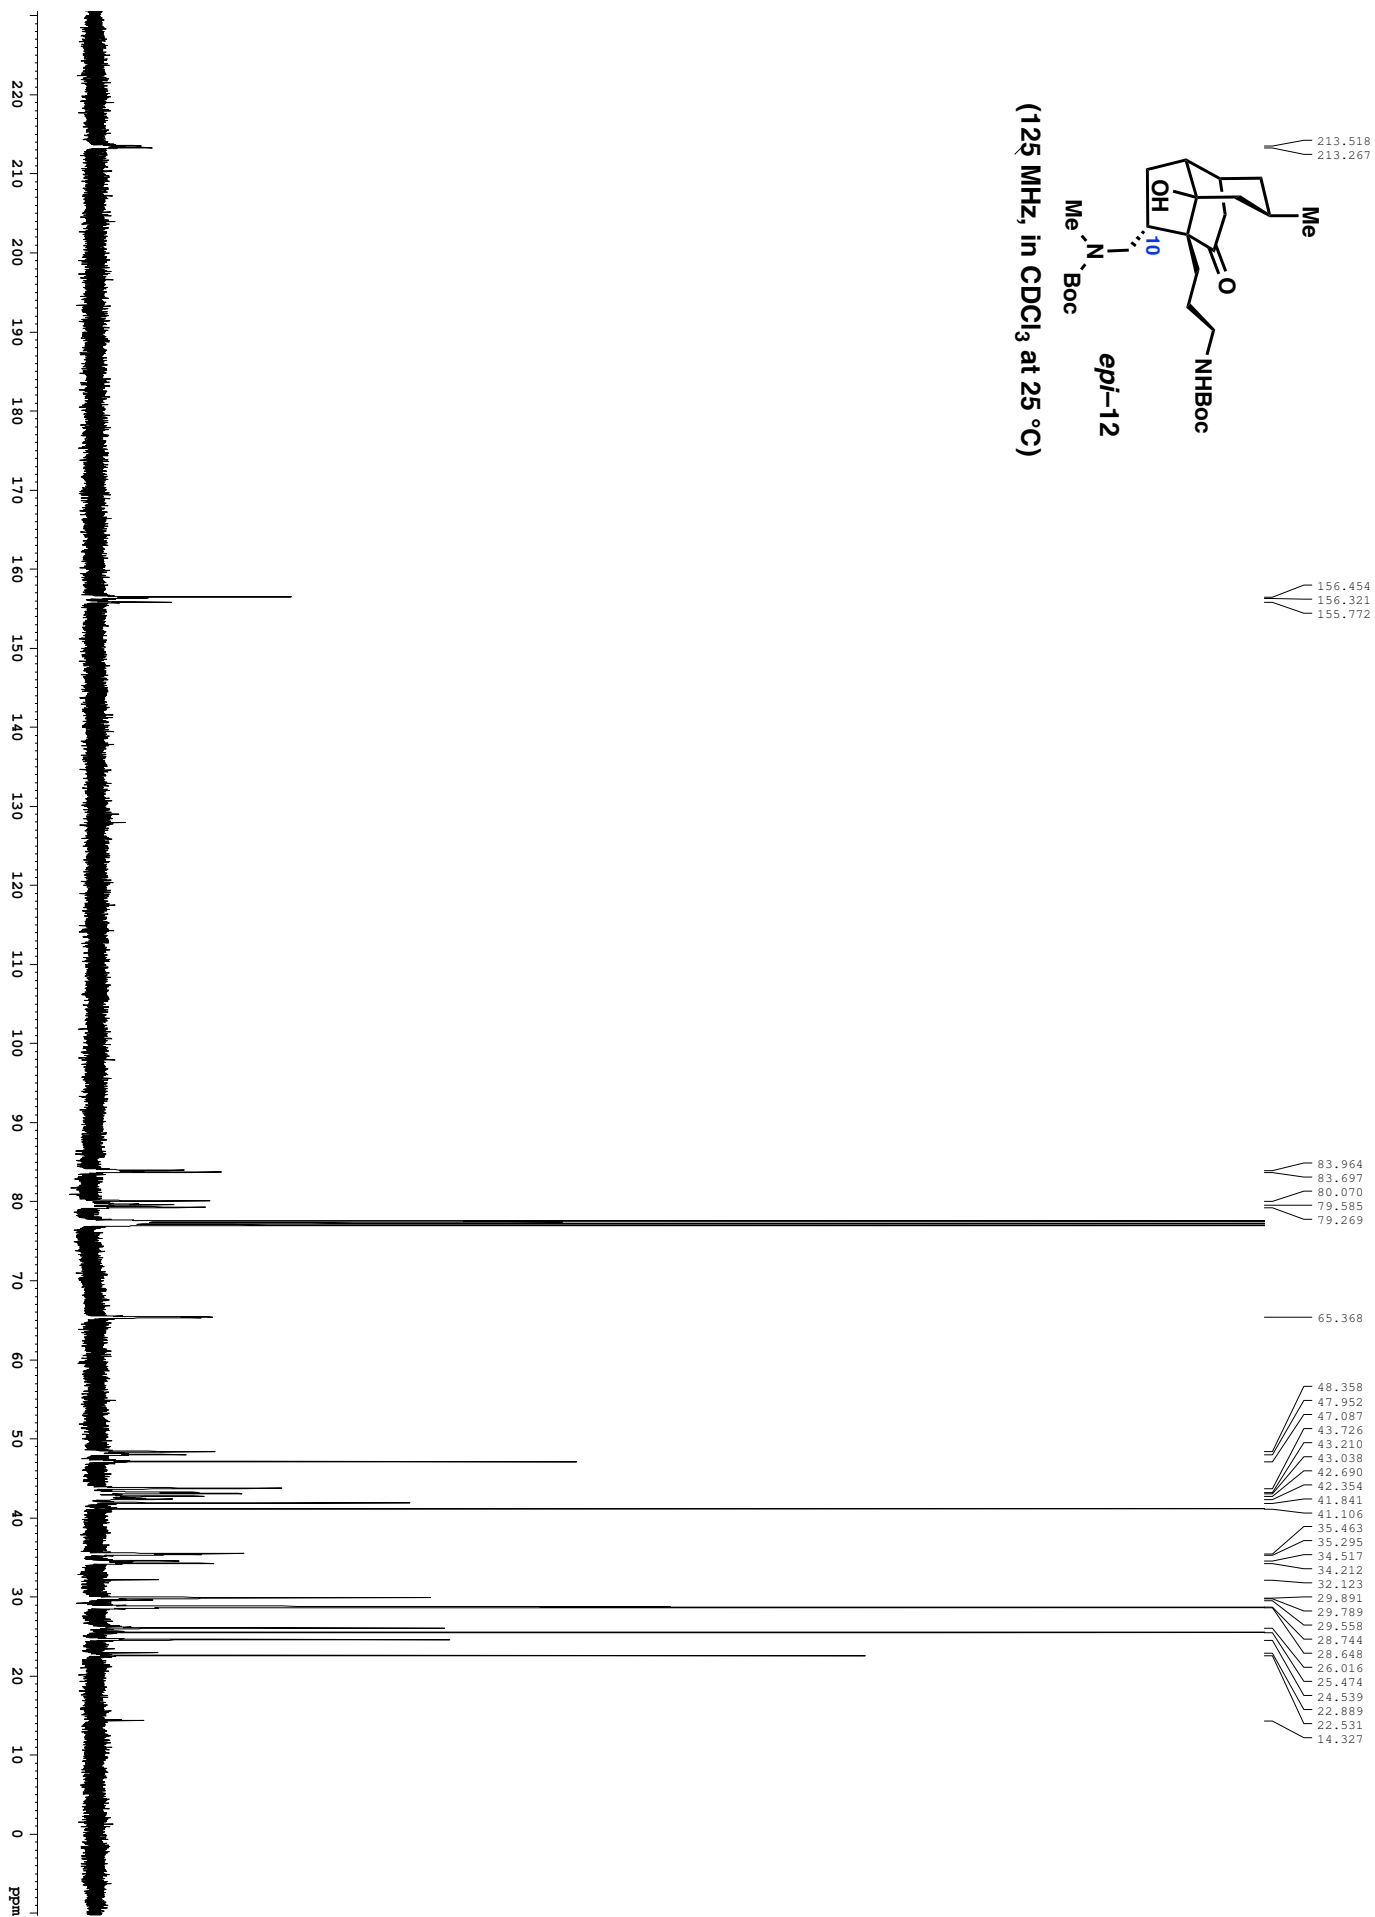

<sup>1</sup>H spectrum(500 MHz, in Tol-d<sub>8</sub> at 85 °C)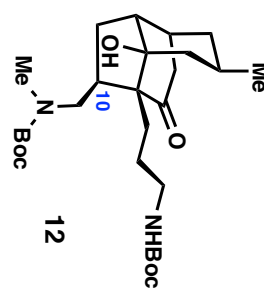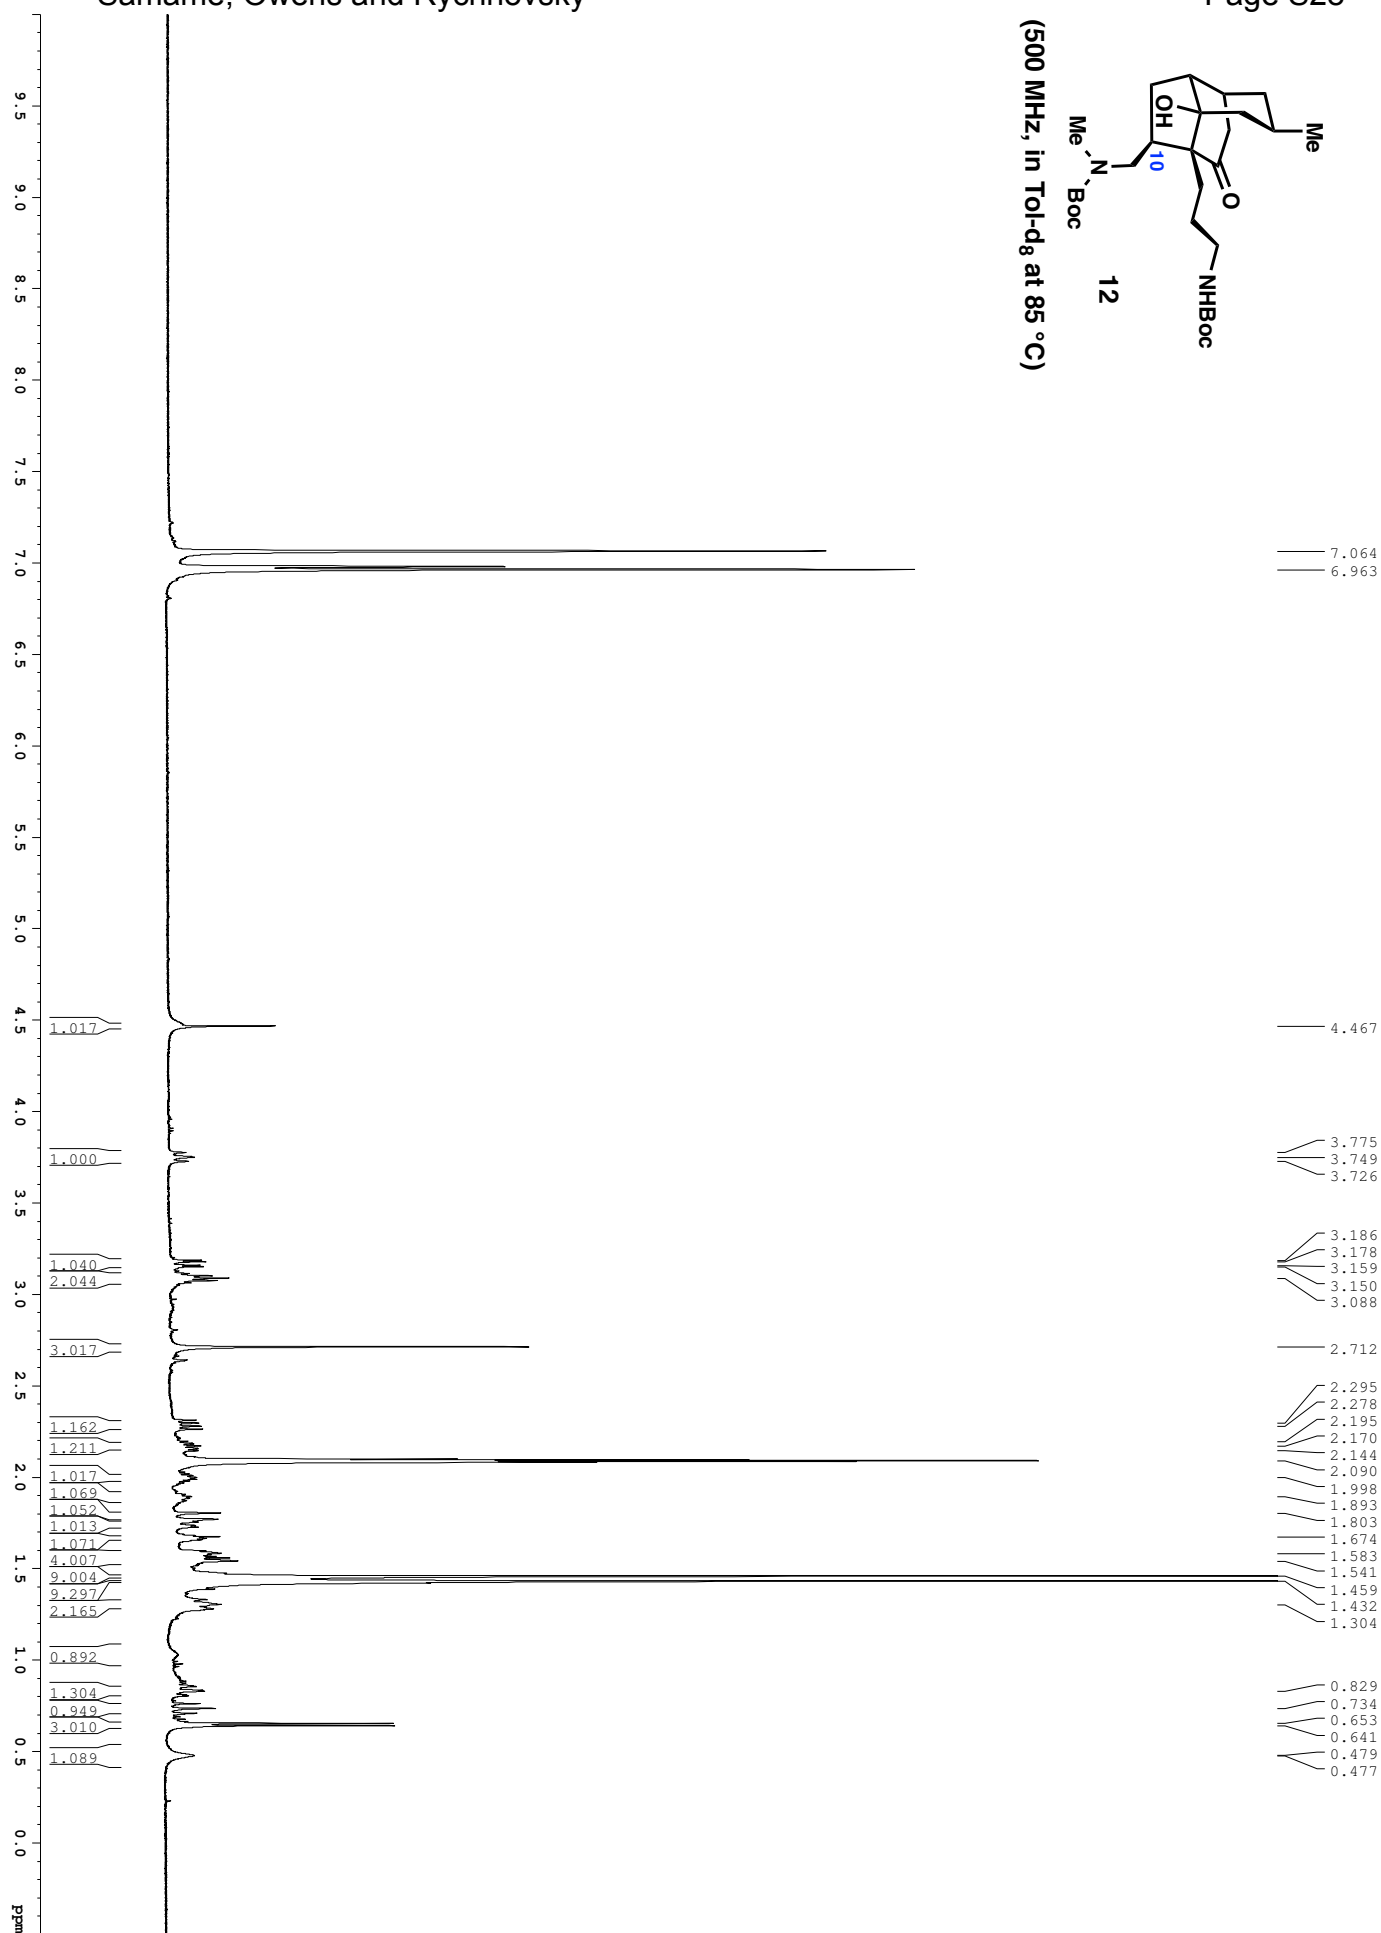

Z-restored spin-echo  $^{13}\text{C}$  spectrum with  $^1\text{H}$  decoupling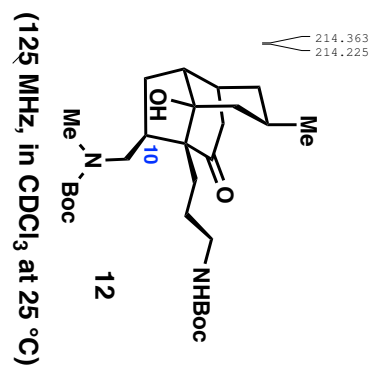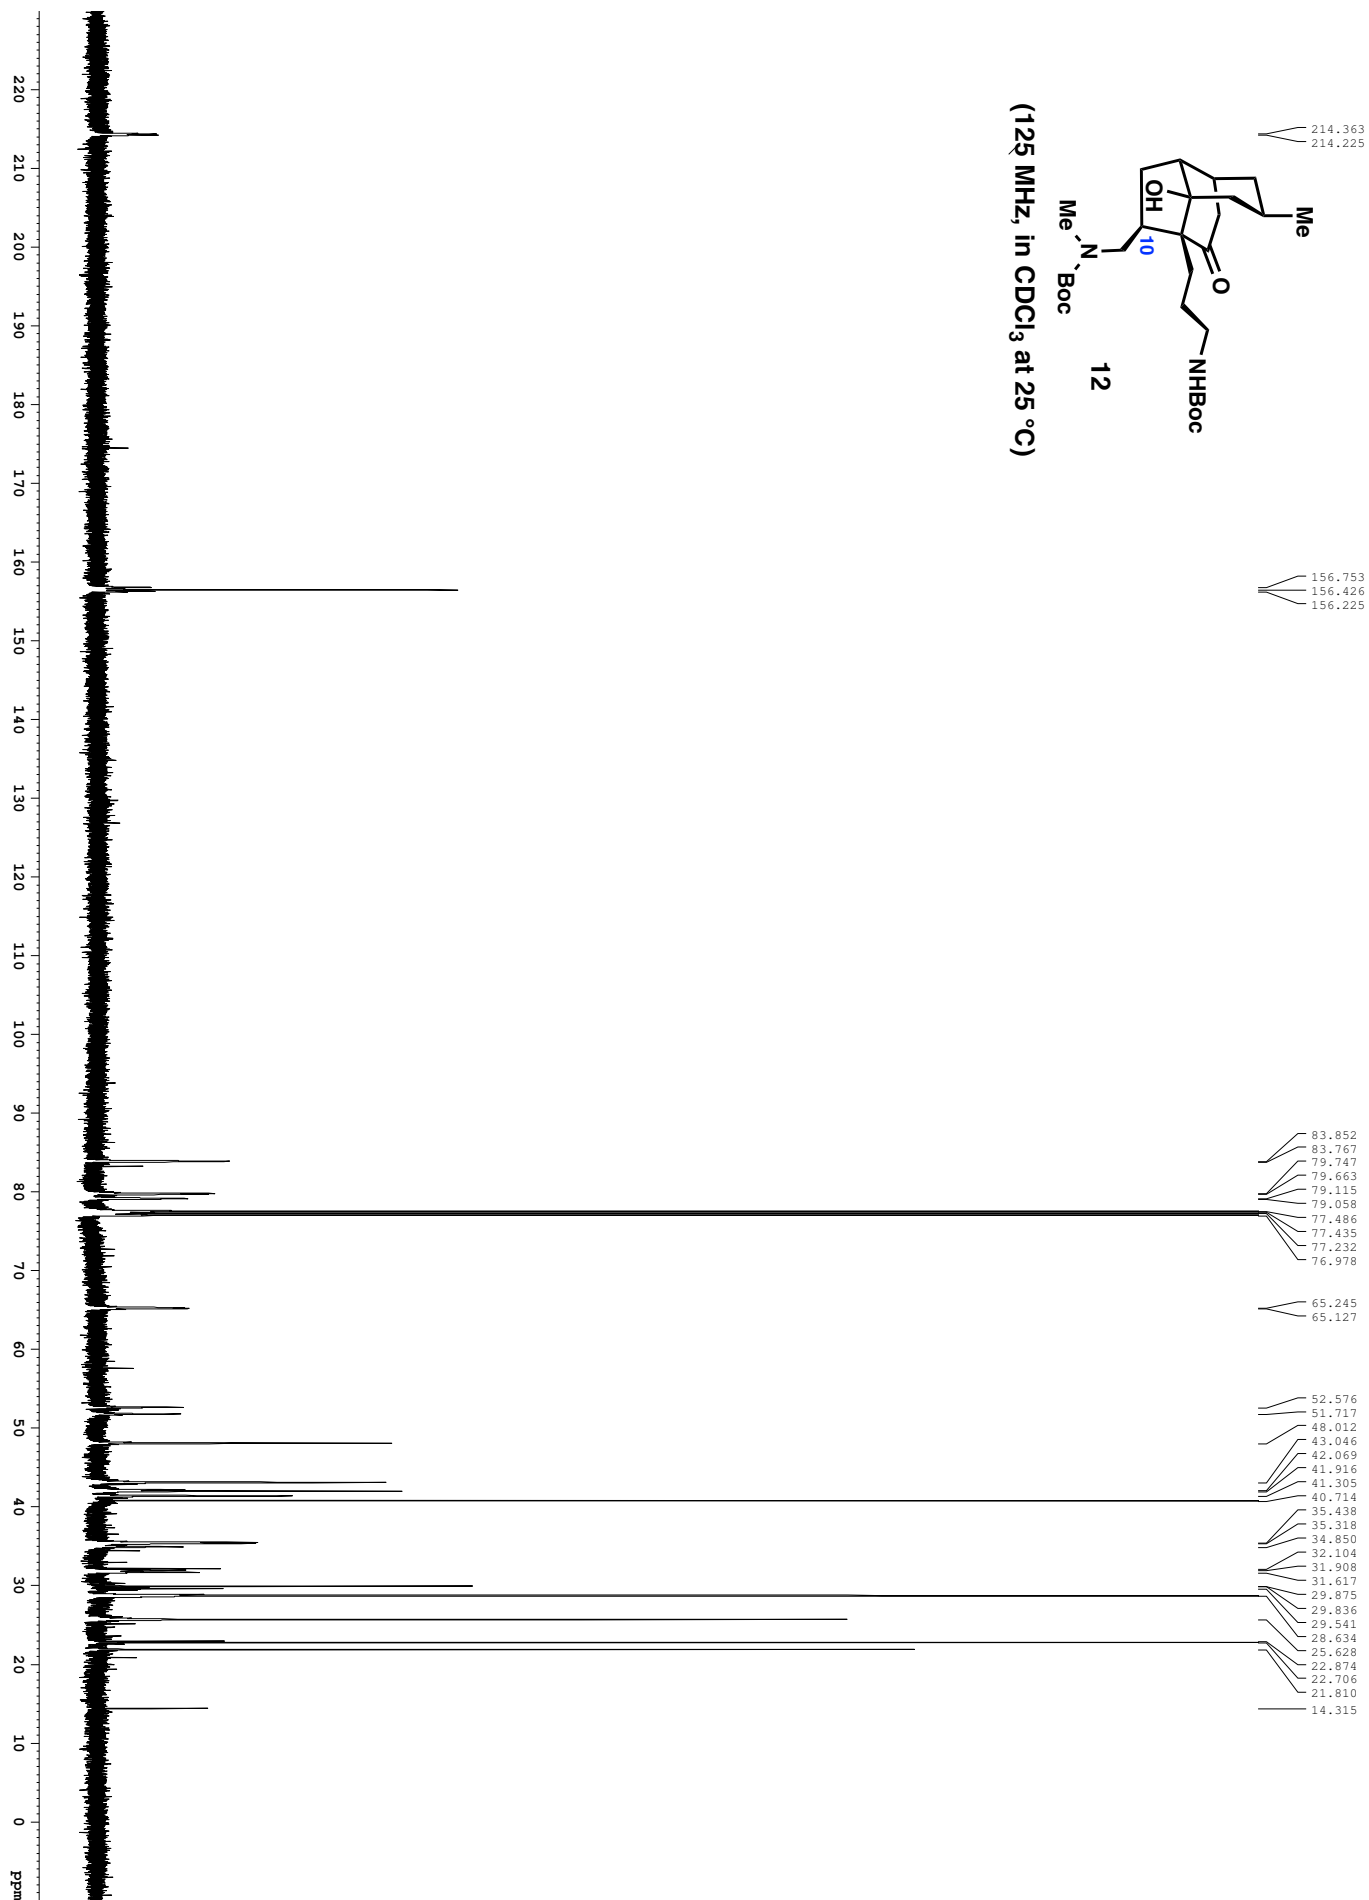

<sup>1</sup>H spectrum

(+)-fastigiatine (1)  
(500 MHz, in CDCl<sub>3</sub> at 25 °C)

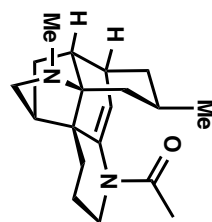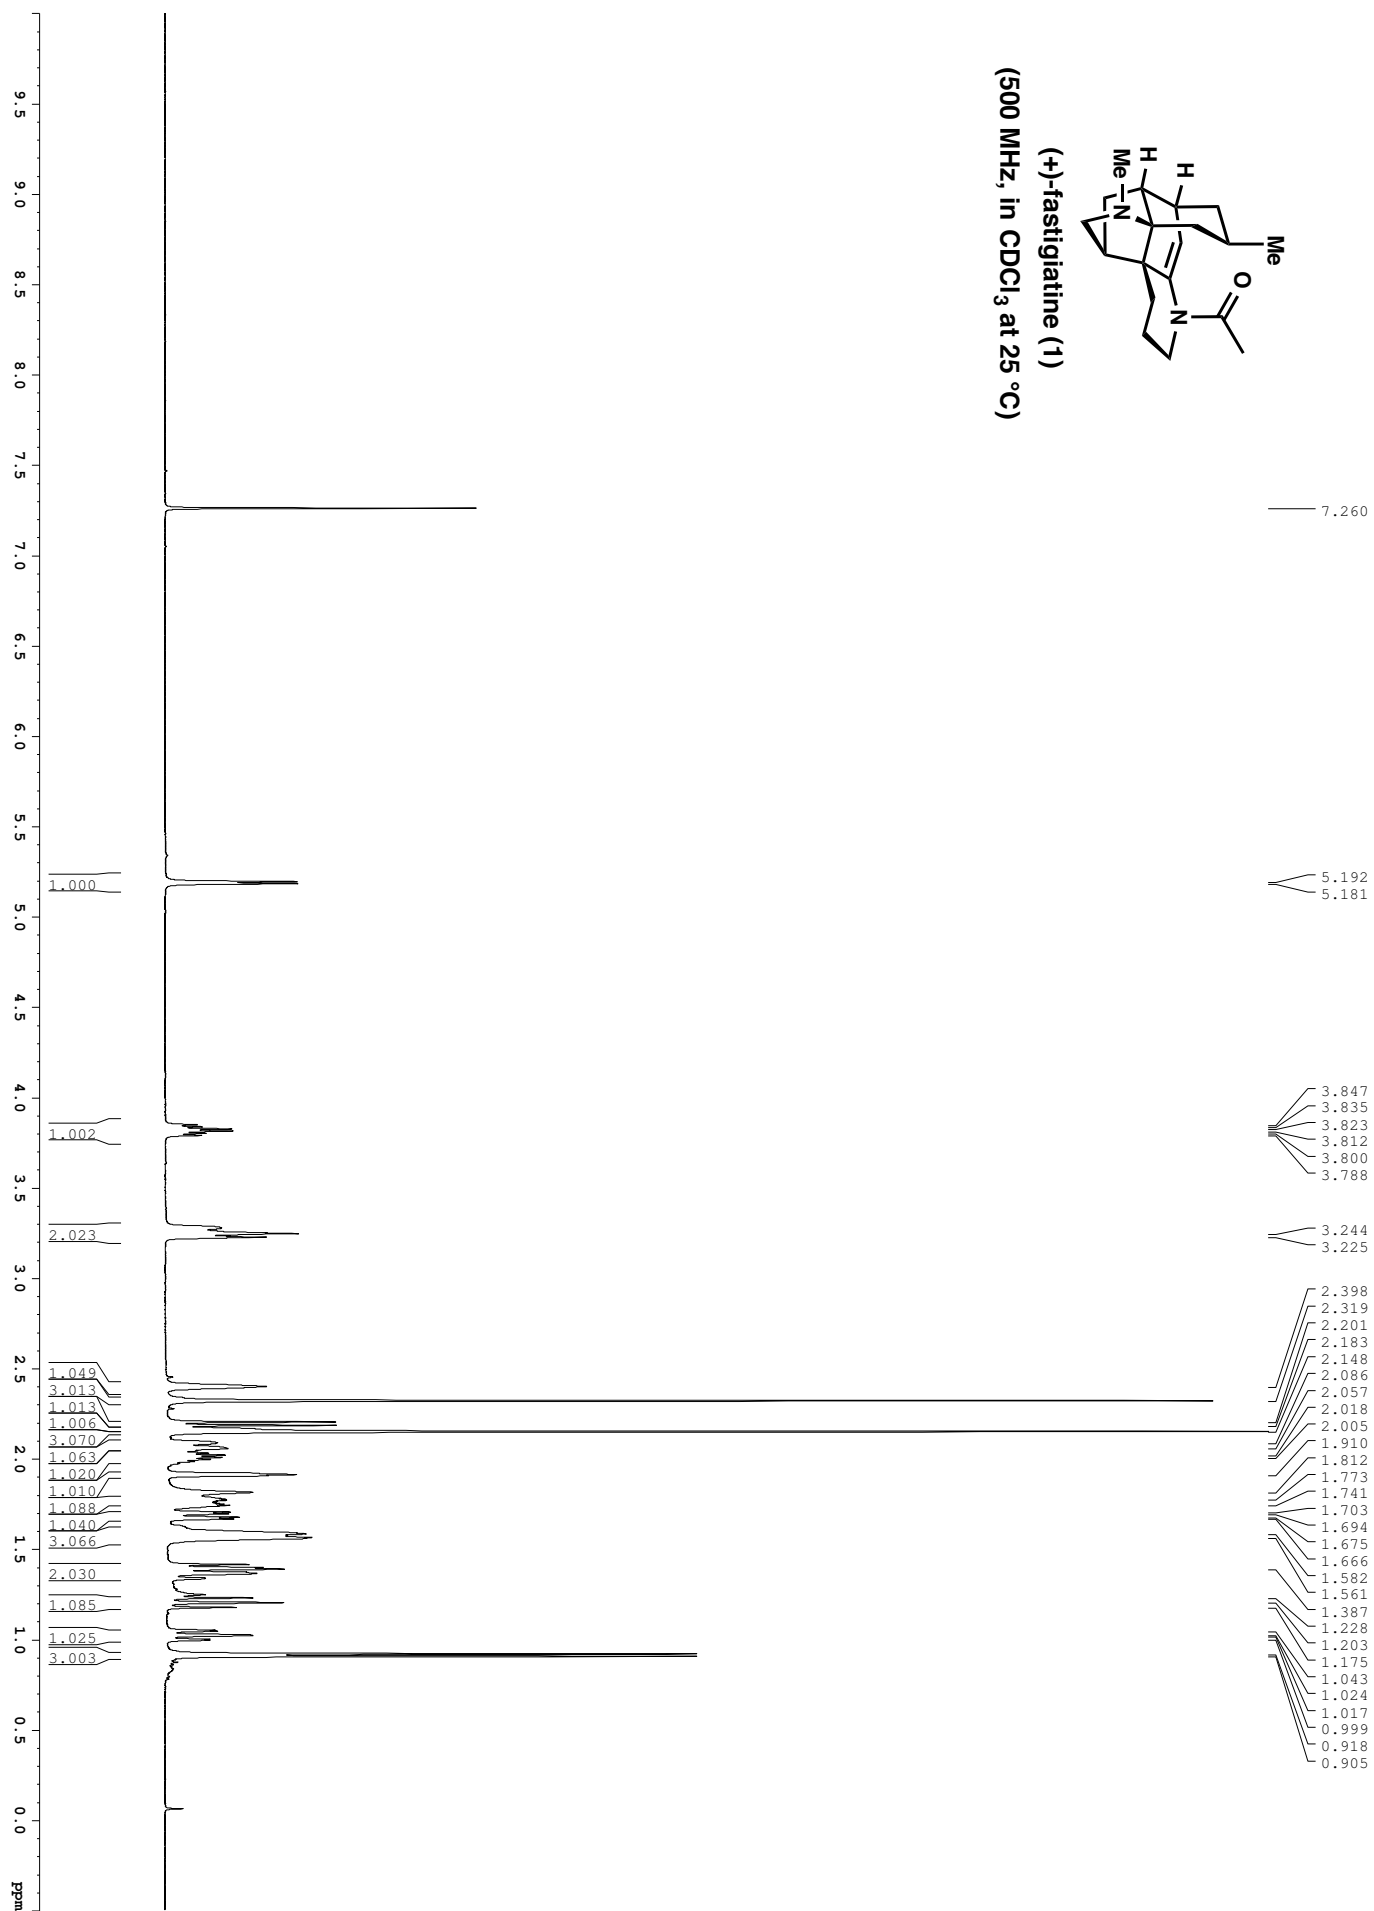

Z-restored spin-echo  $^{13}\text{C}$  spectrum with  $^1\text{H}$  decoupling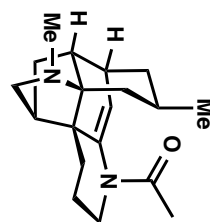

(+)-fastigiatine (1)  
(125 MHz, in  $\text{CDCl}_3$  at 25 °C)

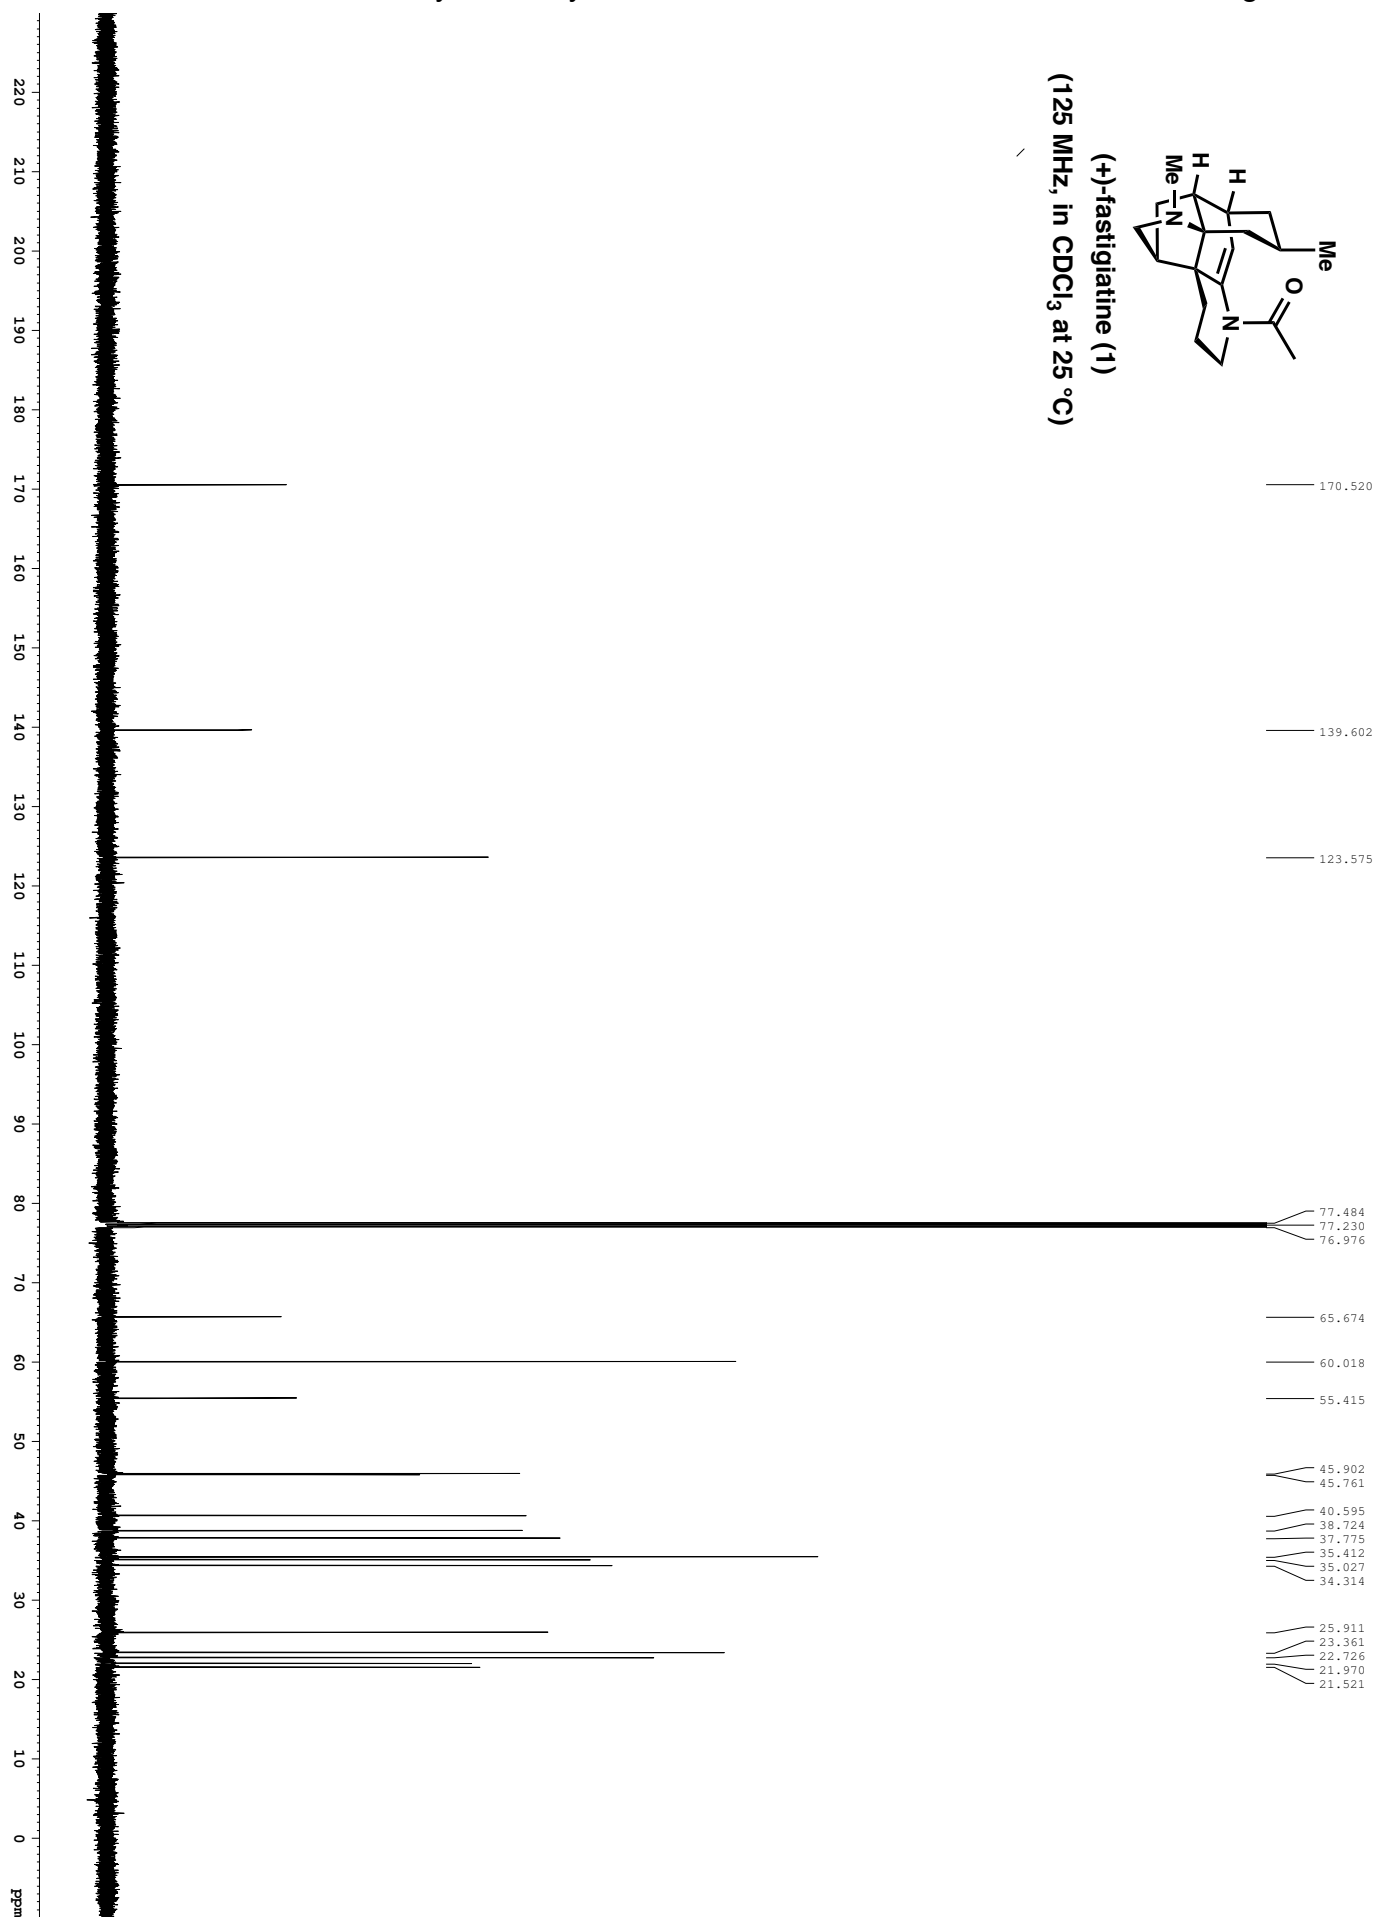

Supplement: c5sc03262h1.pdf [file c5sc03262h1.pdf]
